# Supplementary material
Source: PubMed Central journal article supplement (PMC4223483)
Supplement: supp_M114.039875_mcp.M114.039875-1.pdf [file supp_M114.039875_mcp.M114.039875-1.pdf]

## Yu et al, Supplemental Data

### Supplemental figure and table legends

*Figure S1. GST-fusion VP8\*RV3 binding to defined CFG glycan array.* The GST-VP8\*RV3 was screened on the CFG 5.0 array at: **A.** 20 µg/ml, **B.** 2 µg/ml and **C.** 0.2 µg/ml. A total of 611 glycans are present on the version 5.0 CFG array.

*Figure S2. Flow chart for isolation of human milk glycans and preparation of the human milk shotgun glycan microarray 2 (HM-SGM-v2).*

*Figure S3. MALDI-TOF spectra and reverse-phase HPLC profile of 32 glycans selected for detailed structure analysis.* HPLC profiles were obtained using a hypercarb column connected to a fluorescence detector (Excitation/Emission=330/420 nm). The MALDI-TOF spectra were recorded using reflective positive modes and generated by the software Flexanalysis 3.0 provided with the Bruker UltraFlex II. The MS spectra for each of the glycans were selected to demonstrate only the major molecular ions in each fraction. If the m/z scale is expanded, the isotopic envelope of the molecular ions as well as various adducts can be observed.

*Figure S4. Structures of 14 control glycans on the RV-MAGS subarray.*

*Figure S5. Screening of anti-Le<sup>x</sup> and anti-Le<sup>y</sup> antibodies on the defined CFG glycan array.* **A.** The anti-Le<sup>x</sup> antibody (clone 5F1) generated in our lab was assayed at serial dilutions and the data from 1:5 dilution is shown. The bound antibody was detected by Alexa488 labeled goat anti-mouse IgM. **B.** The commercial CD15 antibody (clone W6D3) from BD Bioscience was assay at 10 µg/ml and detected with Alexa488 labeled goat anti-mouse IgG. **C.** Glycans bound by the two anti-Le<sup>x</sup> antibodies are listed and some Le<sup>x</sup>-containing glycans that were not bound by the two antibodies are also shown. The Le<sup>x</sup> motif in each glycan structure is underlined. **D.** The anti-Le<sup>y</sup> antibody (clone UoN30) was assay at 50 µg/ml and detected with Alexa488 labeled goat anti-human IgG. **E.** Glycans bound by anti-Le<sup>y</sup> antibody (clone UoN30) are listed. The Le<sup>x</sup> antibody (clone 5F1) was from a hybridoma cell line cloned (clone F51) from a fusion of mouse myeloma cells with splenocytes obtained from Swiss Webster mice 8 weeks after infection with *Schistosoma mansoni* cercarie (Puerto Rican strain). Antibody screening was carried out on arrays of glycans with structures related to schistosome glycans. The monoclonal IgM produced by clone F51 bound exclusively to an immobilized Lewis X glycan.

*Figure S6. Comparison of VP8\*RV3 binding open-ring and pyranose-ring glycan derivatives.* VP8\*RV3 was assayed on a small array containing AEAB conjugated open-ring and pyranose-ring (GG) LNT, LNnT and LNFP I.

*Table S1. Reagents used for structural analysis. A.* A list of lectins and antibodies used for structure characterization. Specificity is shown. **B.** Optimized conditions for exoglycosidases used for structure characterization.

*Table S2. Comparison of VP8\* domains from strains RV3, N155, and B233 analyzed on the CFG glycan array.* The three VP8\*-GST fusion constructs were analyzed on versions 5.0 or 5.1 of the CFG glycan microarray at several concentrations. Each glycan was determined as a percentage of the highest RFU in each assay, and an Average Rank was assigned to each glycan. The data for strain B233 was determined from only a single assay. Table S2 is an Excel workbook containing 3 tabs, with each tab showing a comparison of the average rankings where the sorting was based on the highest to lowest ranking of one of the three VP8\*-GST constructs. To demonstrate the difference in binding specificities, VP8\*-binding glycans containing poly lactosamine terminating in Gal $\beta$ 1-4GlcNAc (type 2 LacNAc) are colored Blue; VP8\*-binding glycans containing poly lactosamine terminating in GlcNAc $\beta$ 1-3Gal are colored Orange; and VP8\*-binding glycans terminating in Gal $\beta$ 1-3GlcNAc (type 1 LacNAc) are colored Green.

*Table S3. A summary of 260 glycan samples printed on the HMG-SGM, including obtained amount, mass and proposed composition.* A total of 260 glycan samples were printed on the HMG-SGM. 226 samples were purified glycans. Glycans 89-96 and 235-247 were 1-D separated HMW mixtures. Glycans 248-259 were defined glycans (structures shown in the table) and 260 is the biotin control. The obtained amount of each sample was quantified by fluorescence using lactose-AEAB as standard. The 247 isolated HMG samples were characterized by MALDI-TOF using either reflective positive (neutral HMGs) or negative mode (sialyl HMGs), and the compositions were proposed based on the mass. The compositions of several samples (indicated with ?) were not predicted as their mass did not match any composition. For the high molecular weight (HMW) samples, the mass represents major peaks that match HMG composition. Abbreviations: H- hexose, N-acetylhexosamine, F-fucose, S-sialic acid.

*Table S4. Plant lectin and antibody binding data for Fig. 2 and Fig. 3 in tabular form.* Each data point is the average of four RFU values.

*Table S5. Rotavirus VP8\* binding data for Fig. 4 and Fig. 5 in tabular form. Each data point is the average of four RFU values.*

*Table S6. Virological and clinical characteristics of rotavirus strains used in this study.*

*Table S7. Lectin and antibody binding data for structural analysis. The combined binding data of the RV-MAGS subarray interrogated with different lectins and antibodies at one or multiple concentrations.*

Figure S1. GST-fusion rotavirus VP8\*RV3 binding to CFG glycan array.

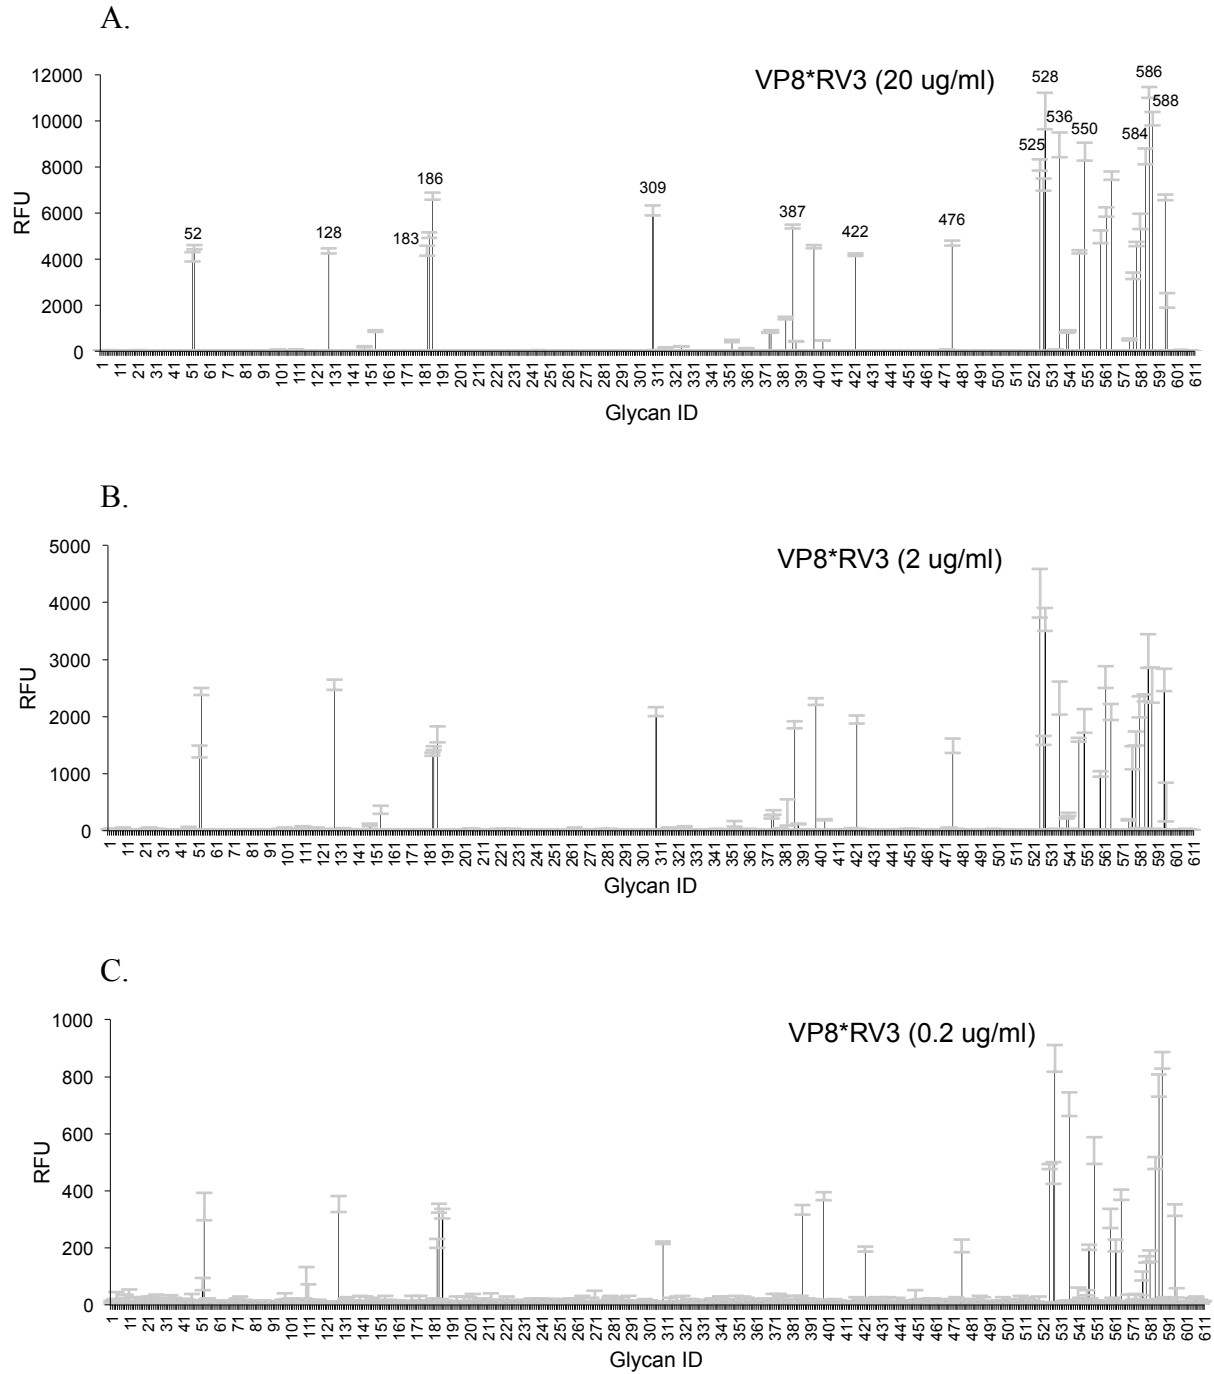

Figure S2. Flow chart for isolation of human milk glycans and preparation of the human milk shotgun glycan microarray 2 (HM-SGM-v2)

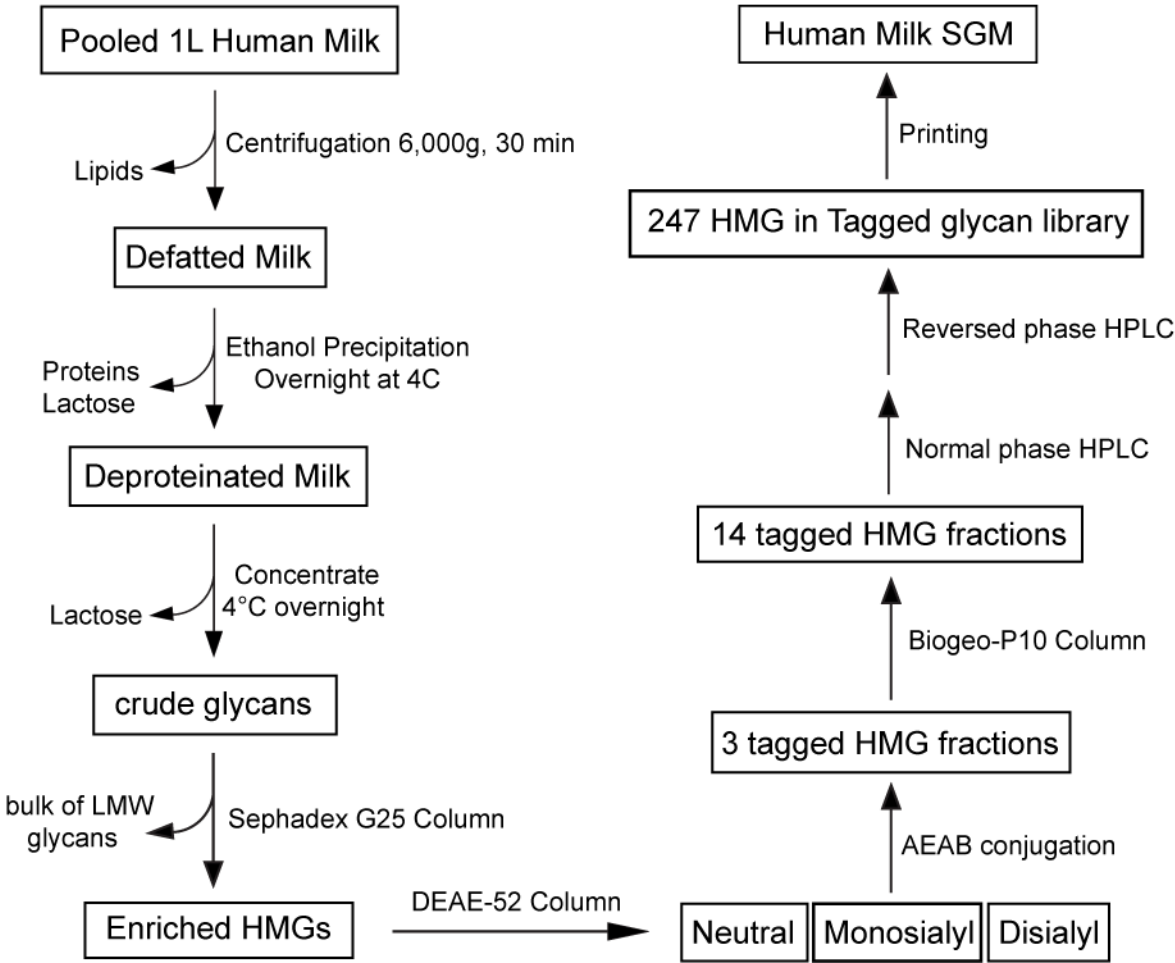

Figure S3. MALDI-TOF spectra and reverse-phase HPLC profile of 32 unknown glycans selected for detailed structure analysis. The MS spectra for each of the glycans were selected to demonstrate only the major molecular ions in each fraction. If the  $m/z$  scale is expanded, the isotopic envelope of the molecular ions as well as various adducts can be observed.

### HMG-5

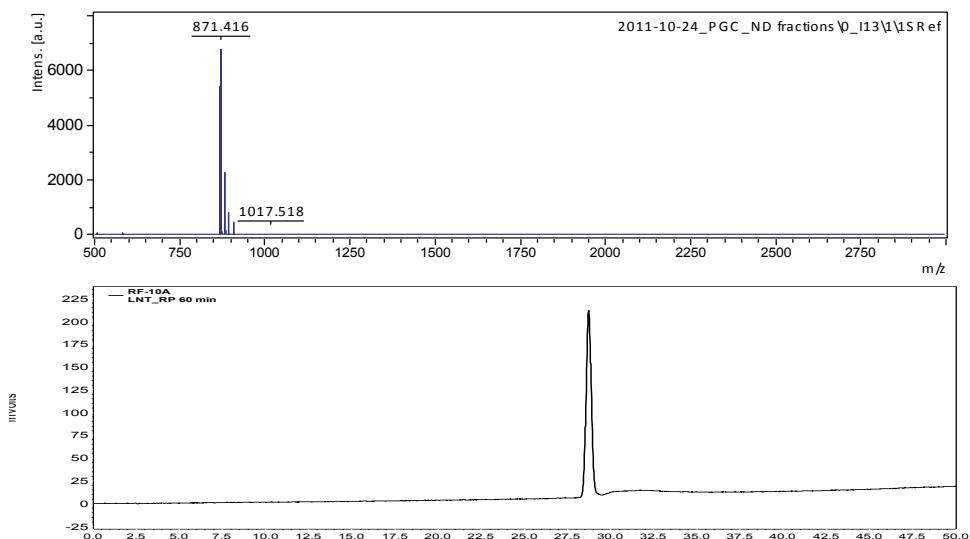

### HMG-8

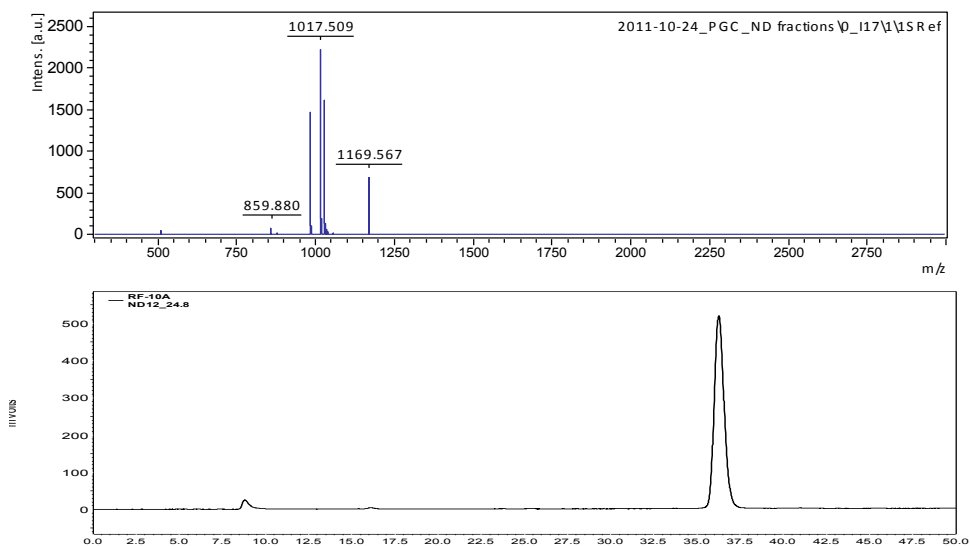

### HMG-13

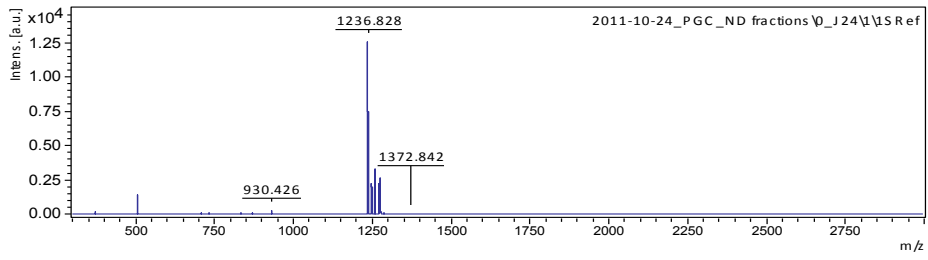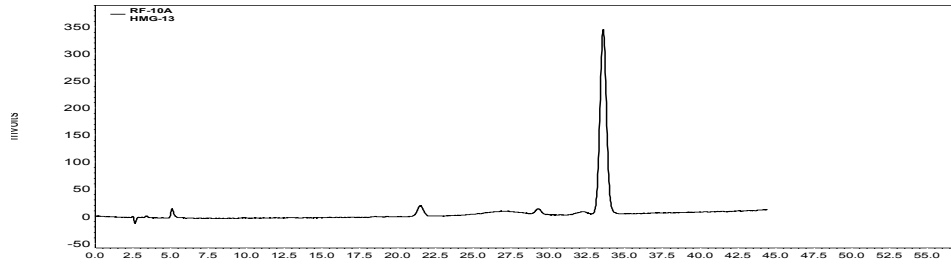

### HMG-14

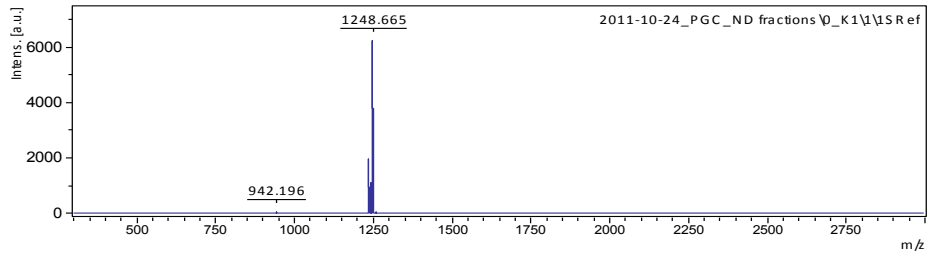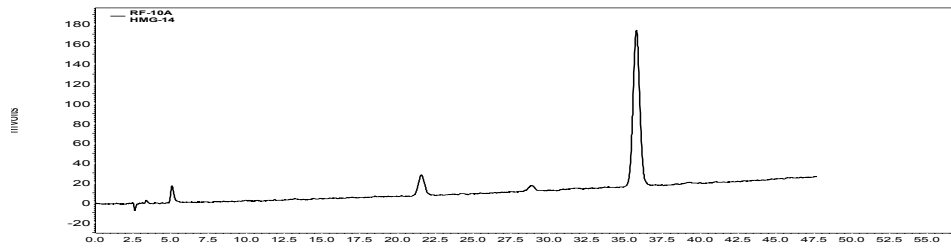

### HMG-16

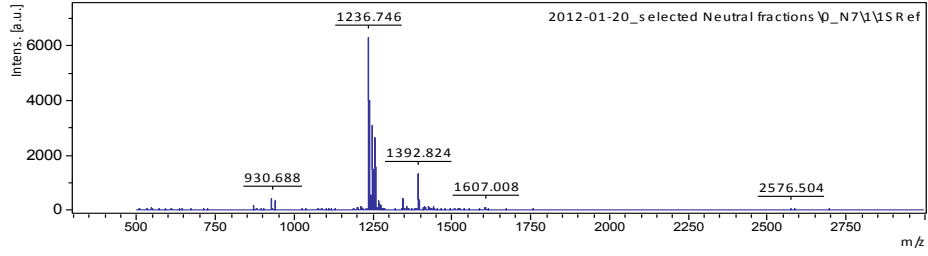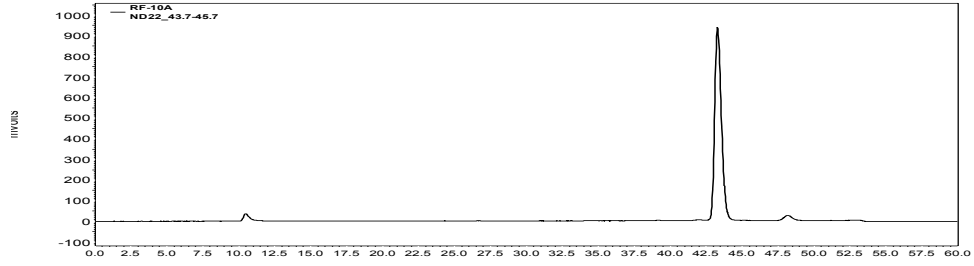

### HMG-18

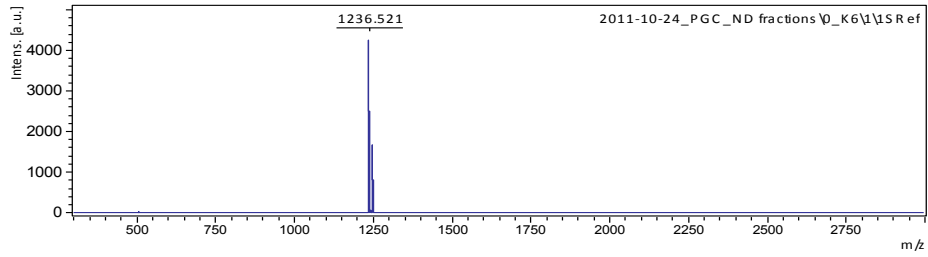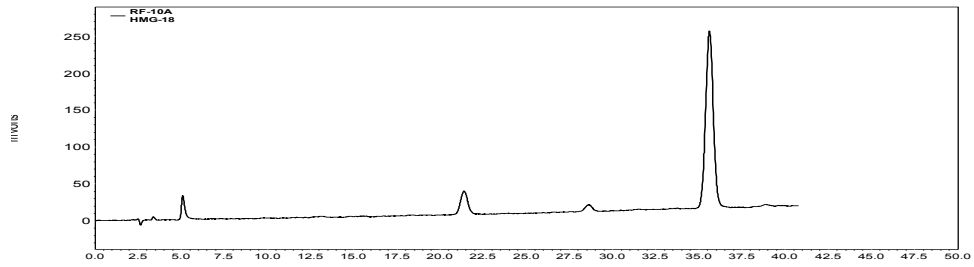

### HMG-20

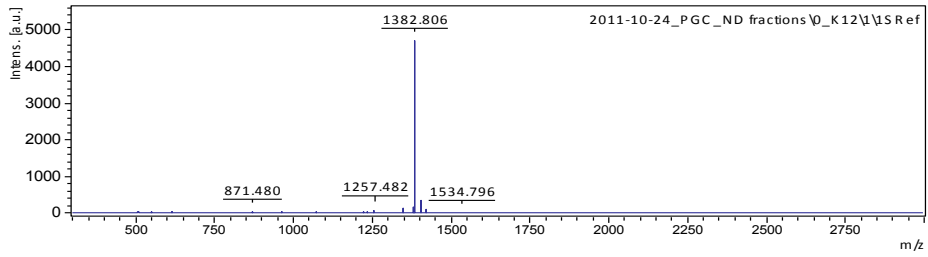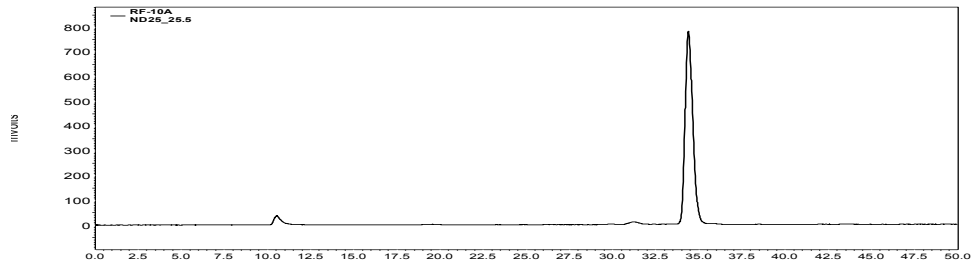



### HMG-21

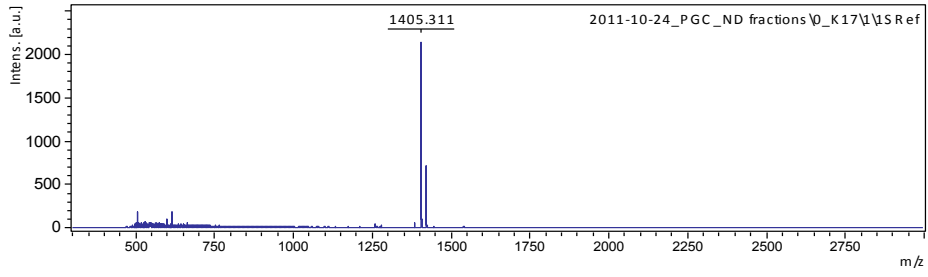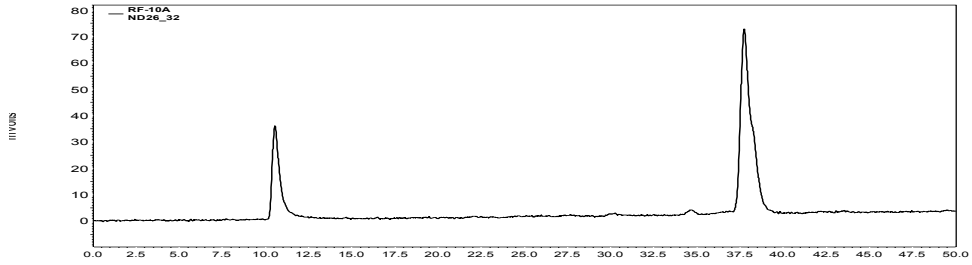

### HMG-23

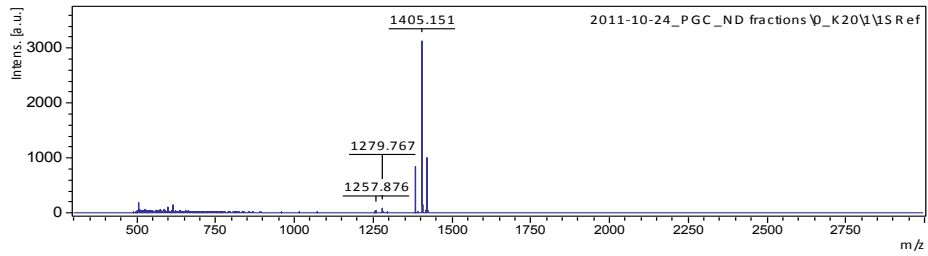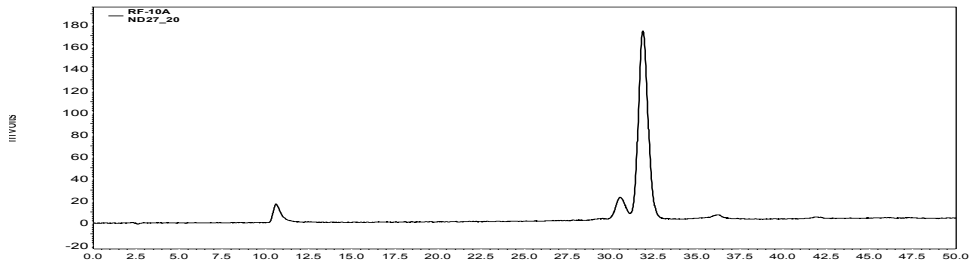

### HMG-27

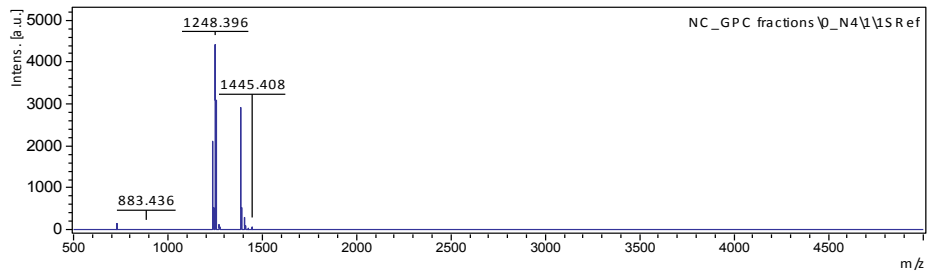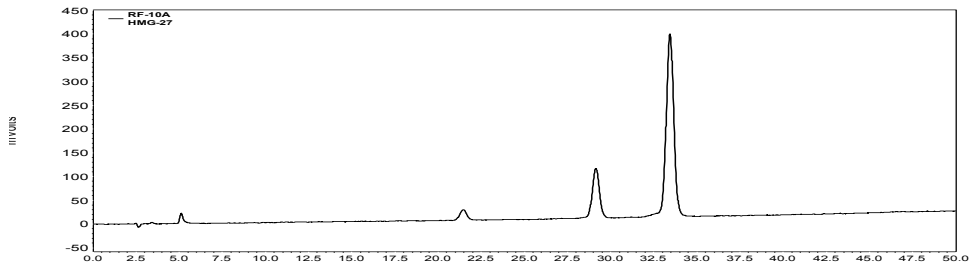

### HMG-28

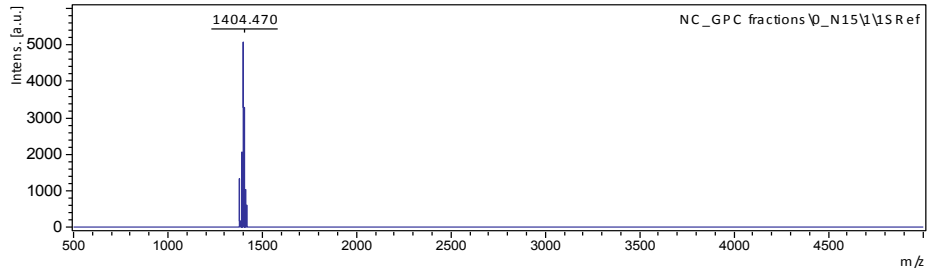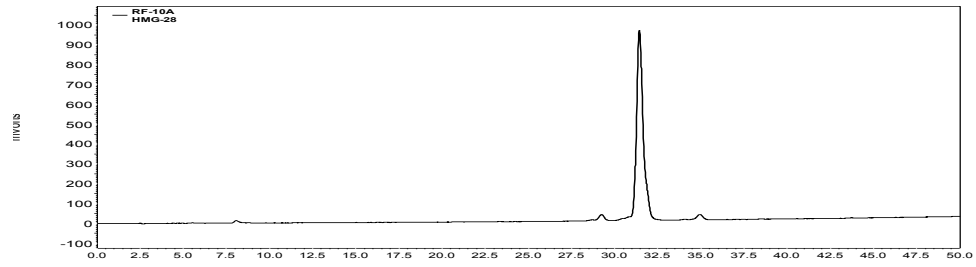

### HMG-29

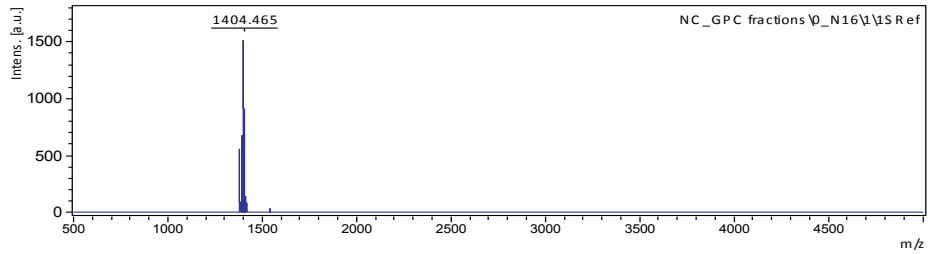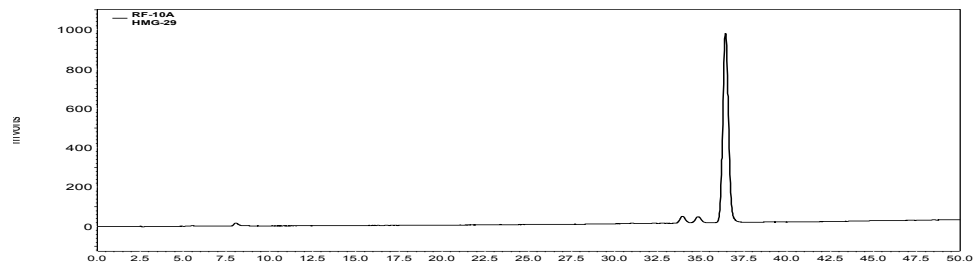

### HMG-31

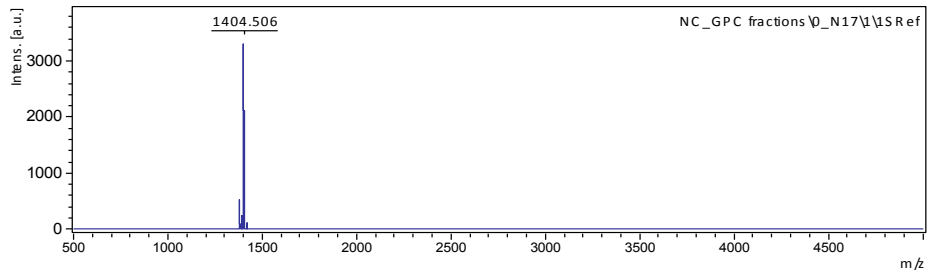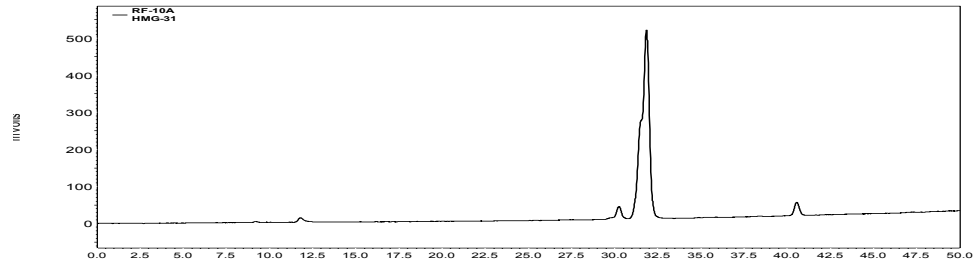

### HMG-33

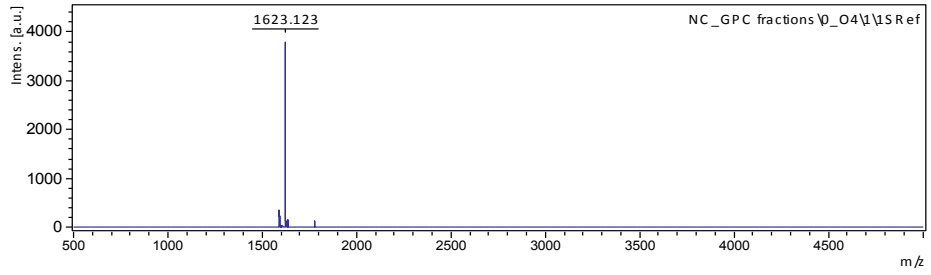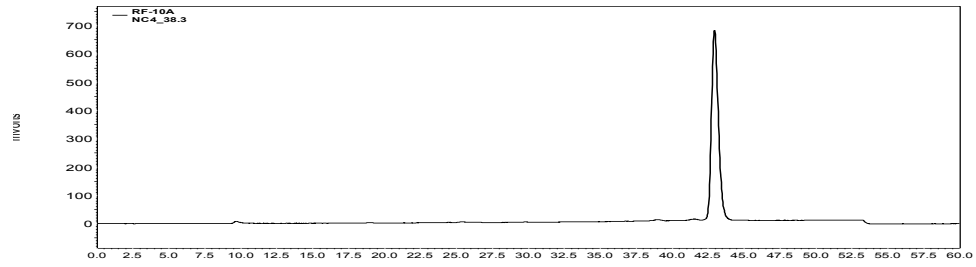

### HMG-34

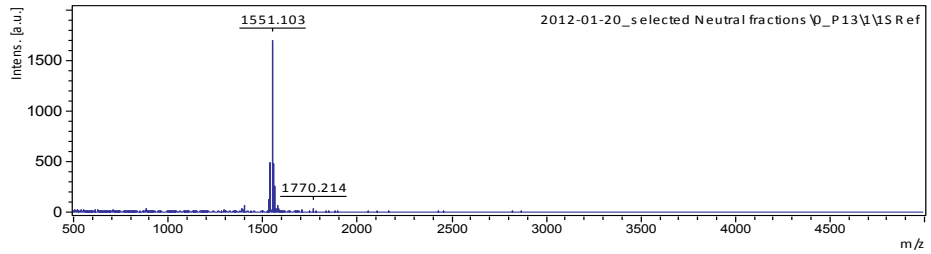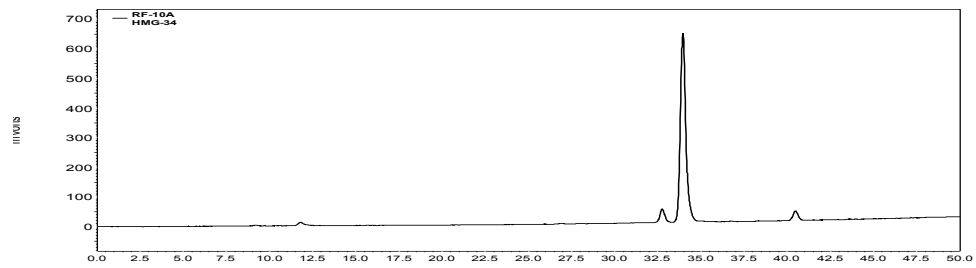

### HMG-37

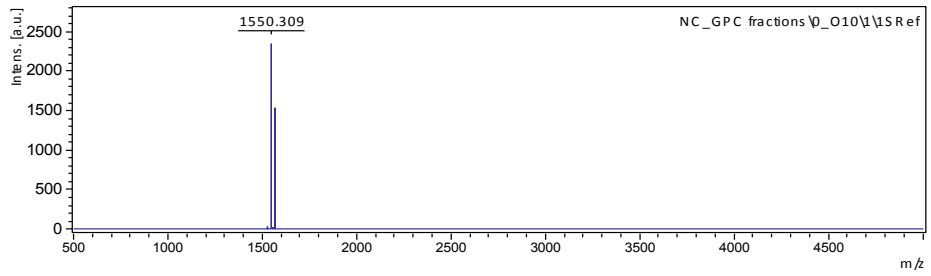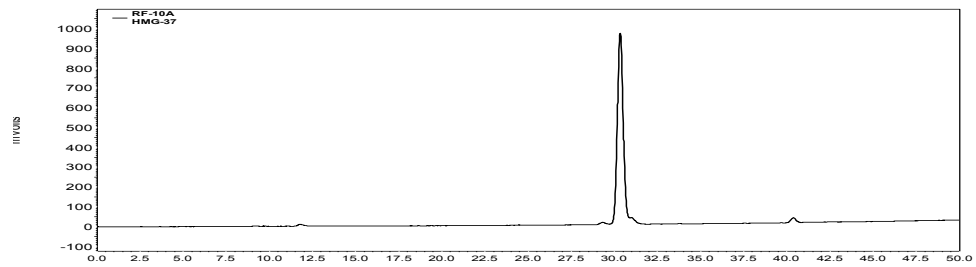

### HMG-41

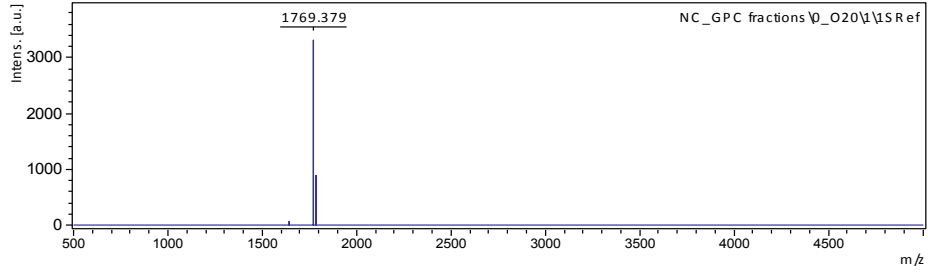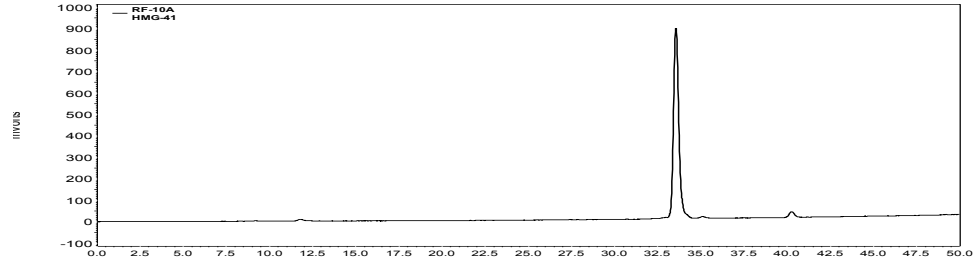

### HMG-45

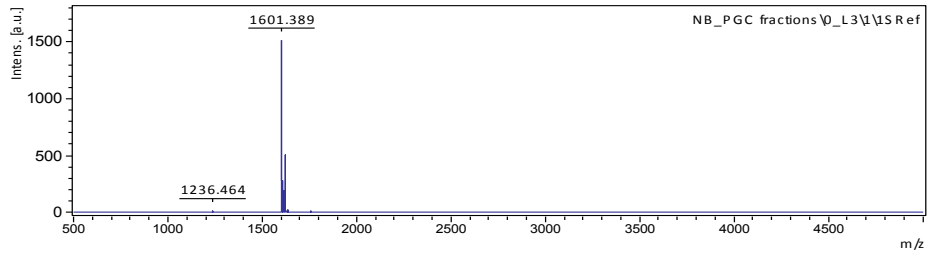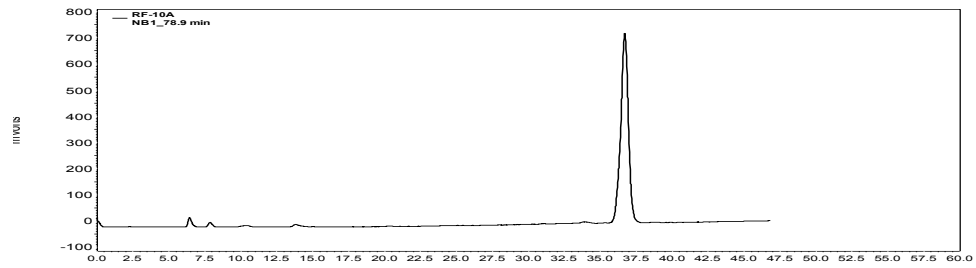

### HMG-47

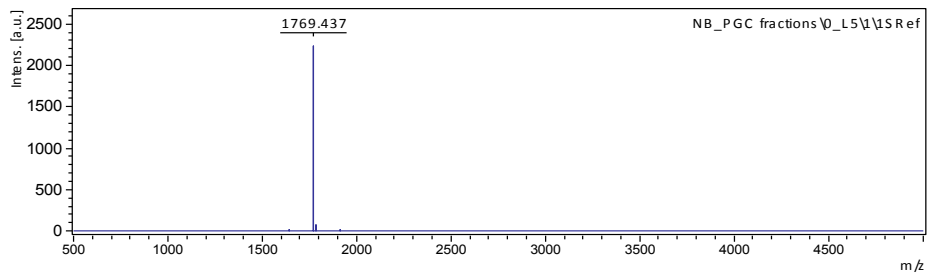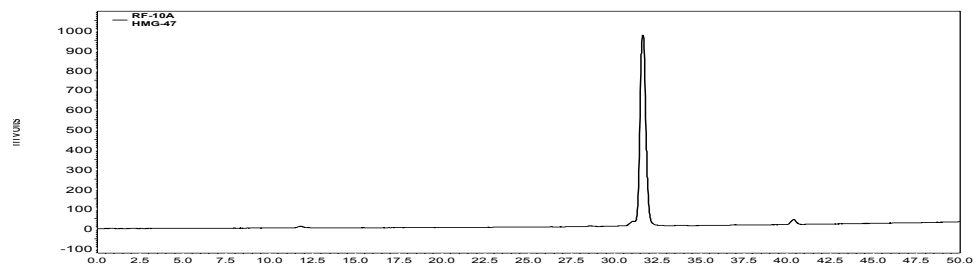

### HMG-48

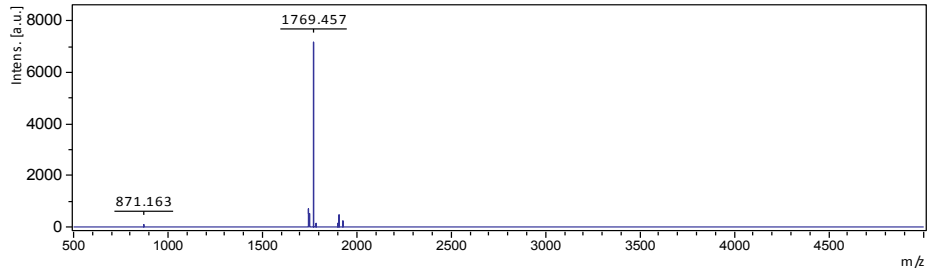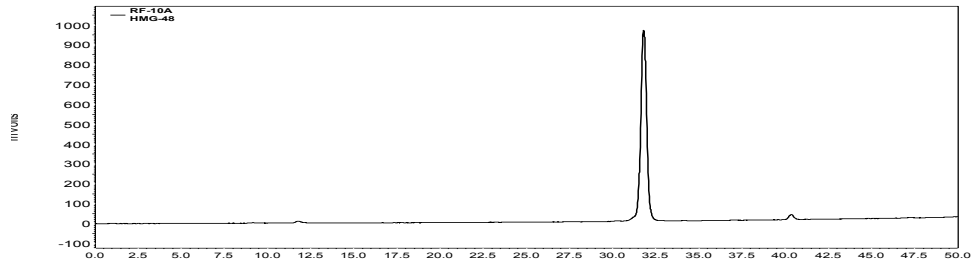

### HMG-49

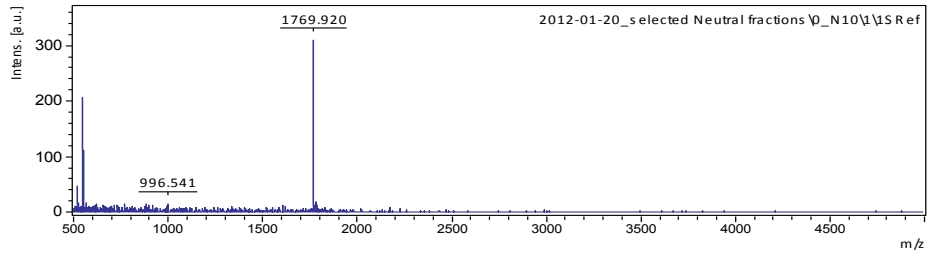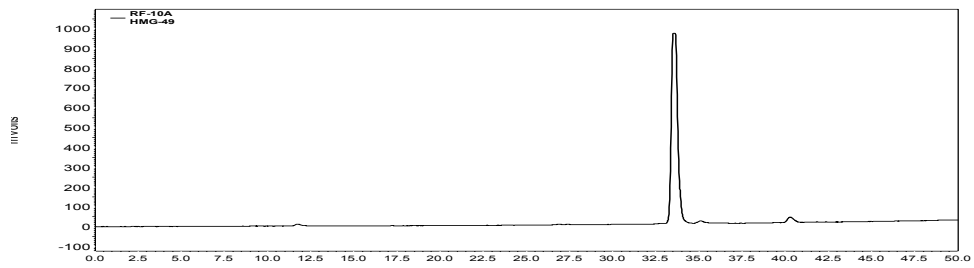

### HMG-51

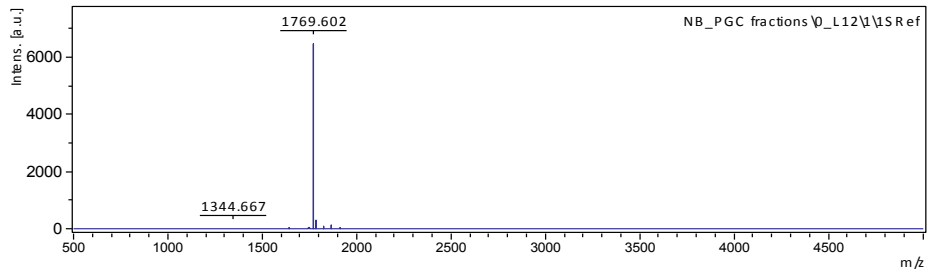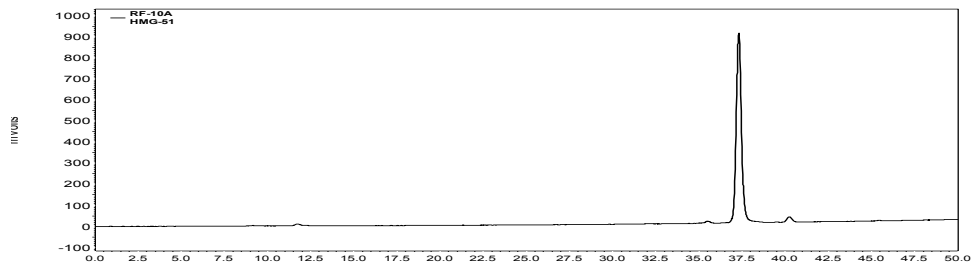

### HMG-54

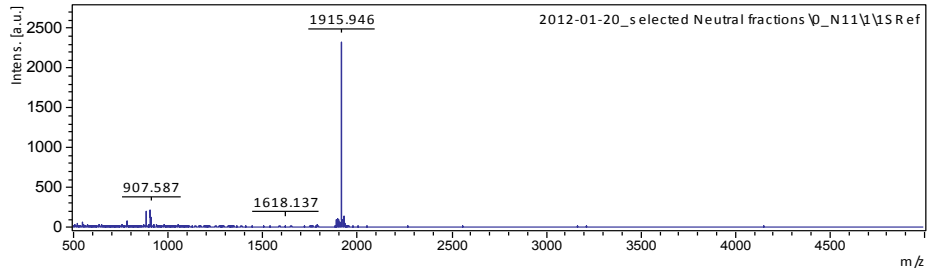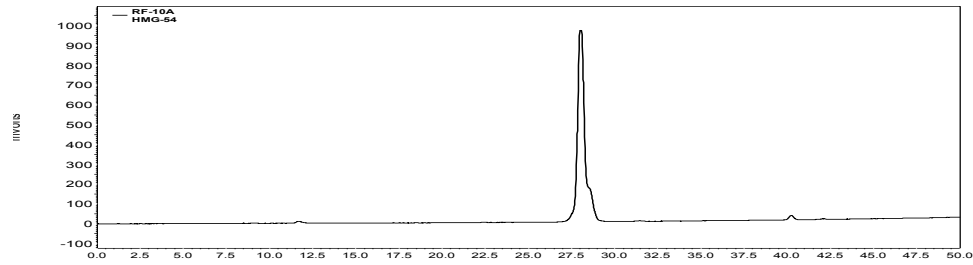

### HMG-55

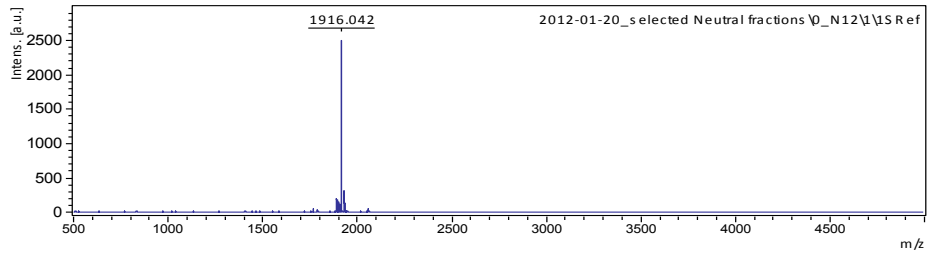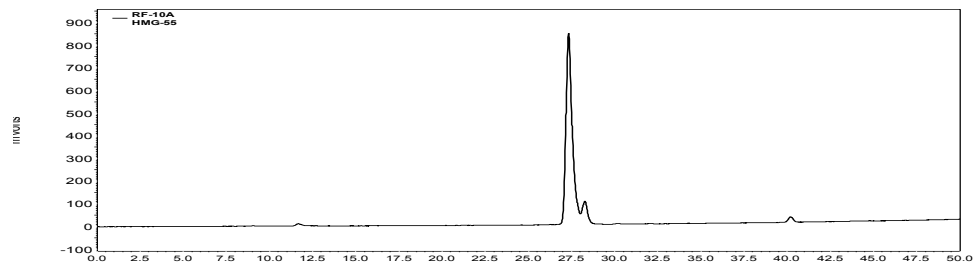

### HMG-56

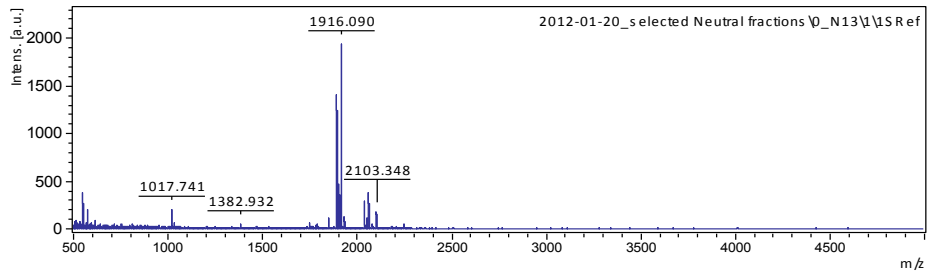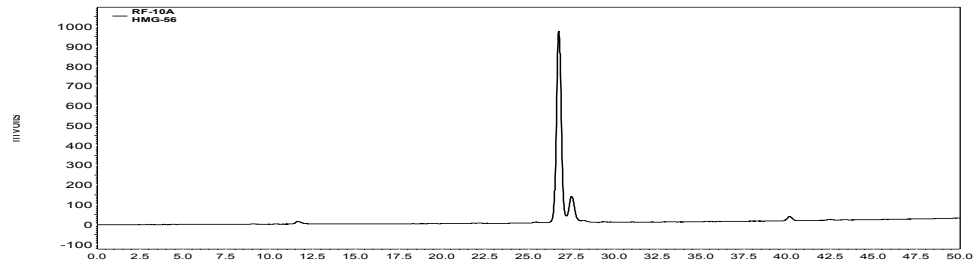

### HMG-60

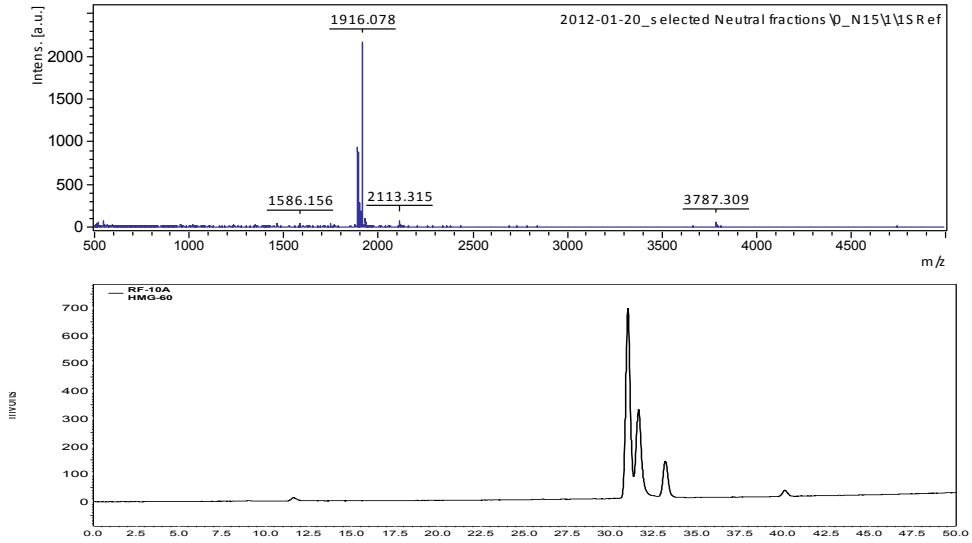

### HMG-62

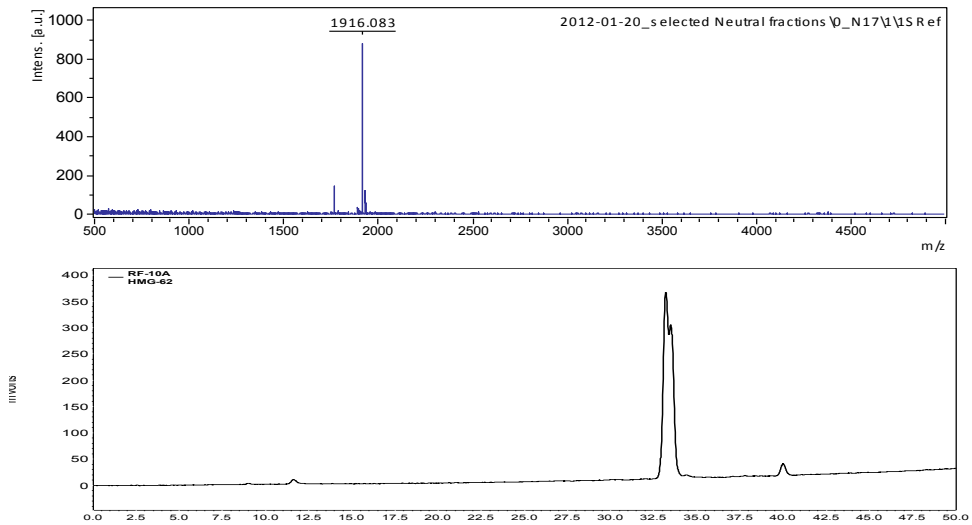

### HMG-65

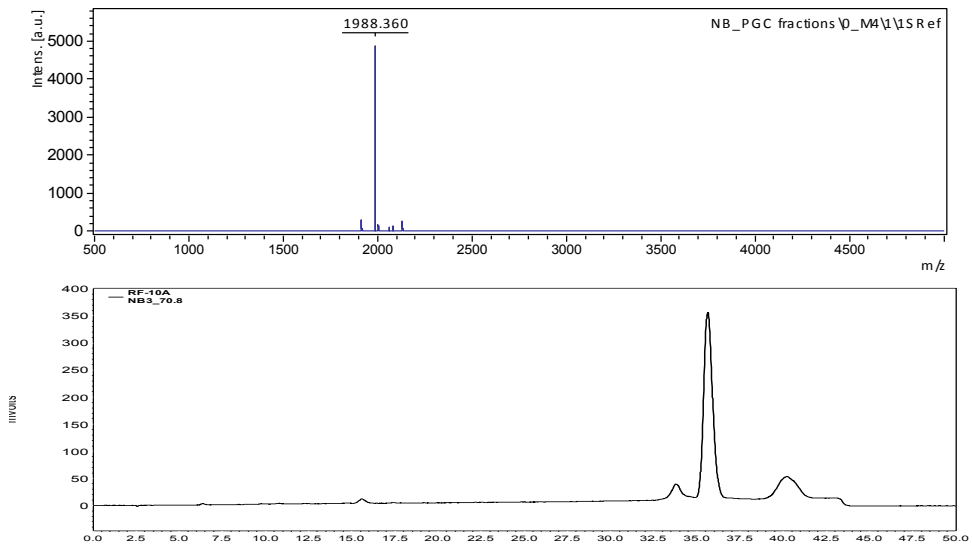

### HMG-66

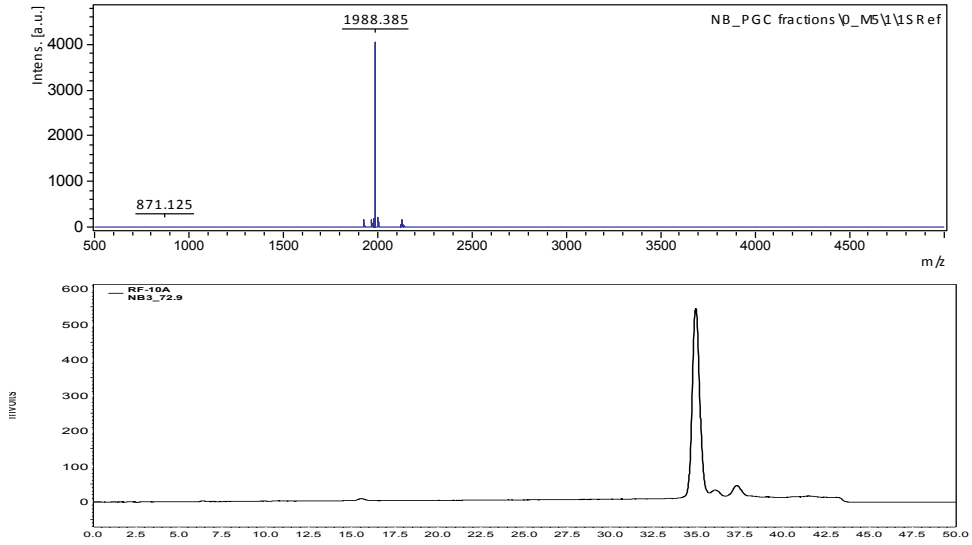

### HMG-67

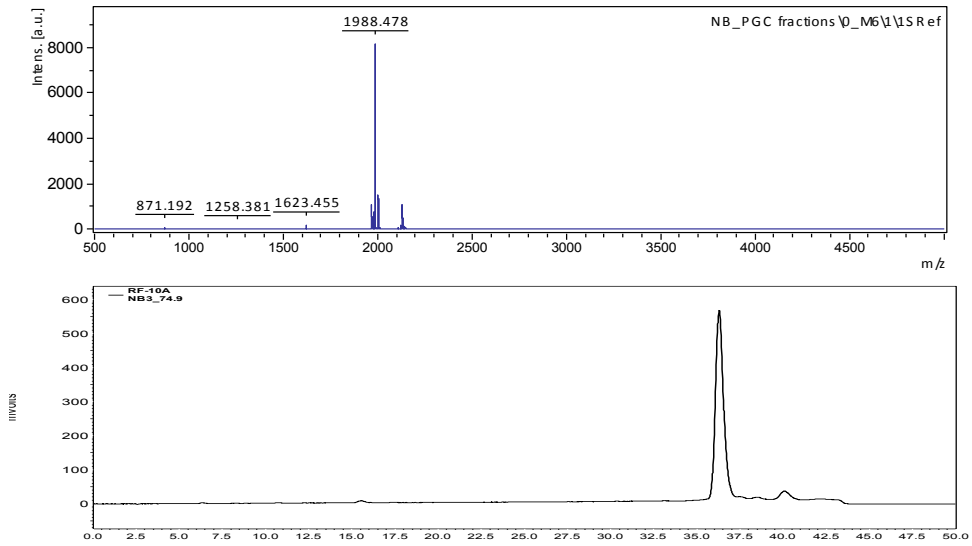

### HMG-69

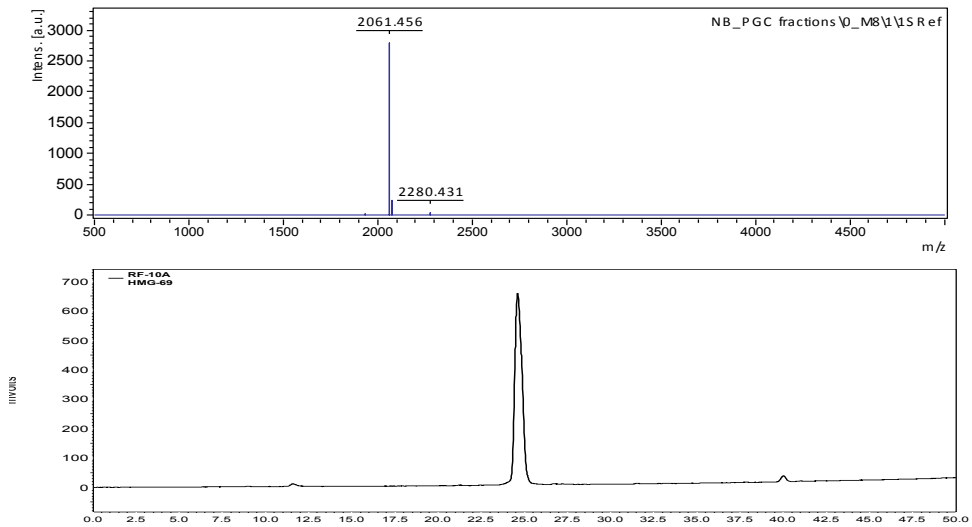



# HMG-76

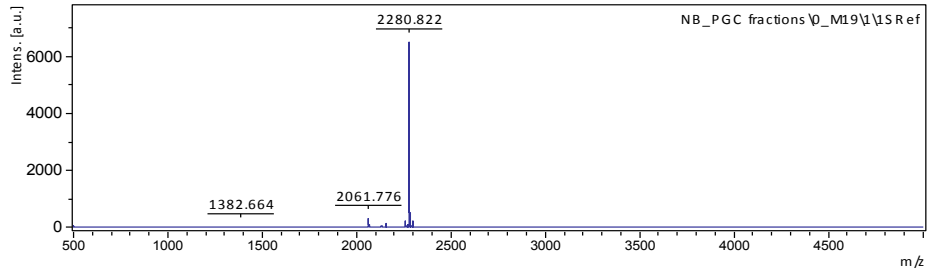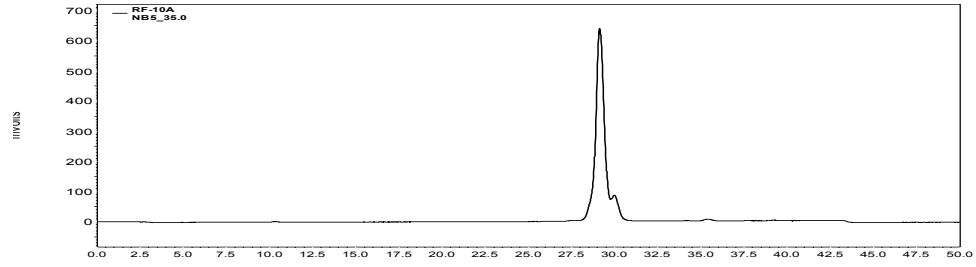

Figure S4. Structures of 14 control glycans on the RV-MAGS subarray

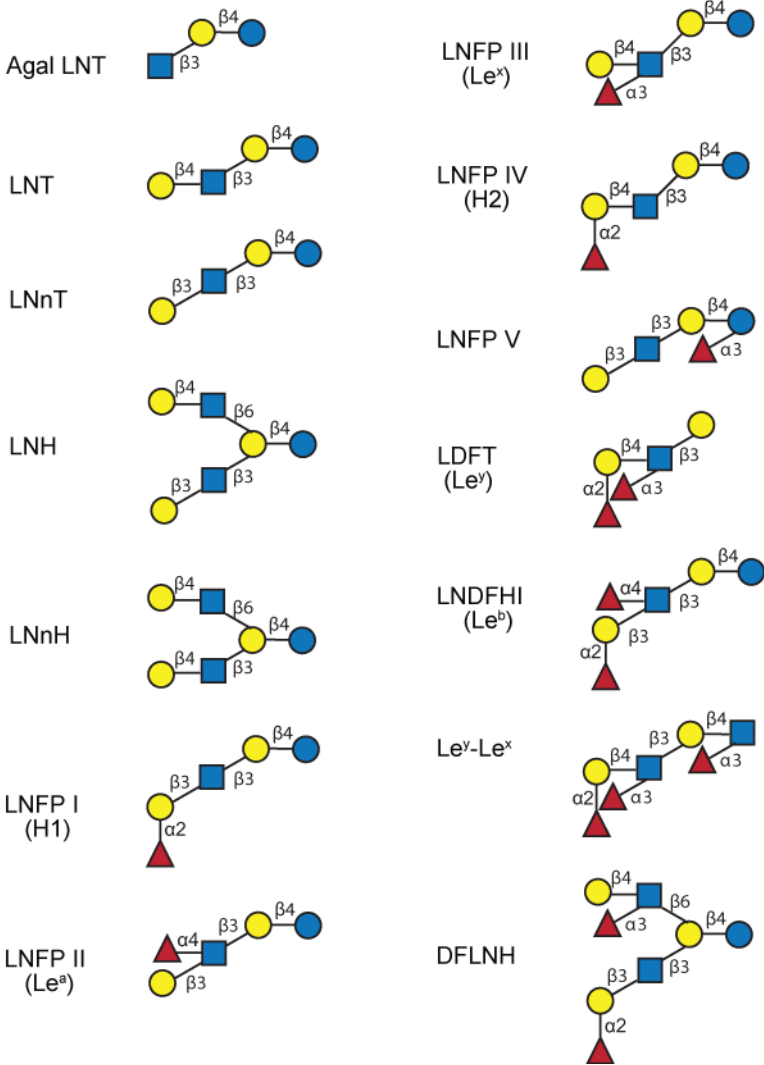

Figure S5. Screening of anti-Le<sup>x</sup> and anti-Le<sup>y</sup> antibodies on defined CFG glycan array.

A.

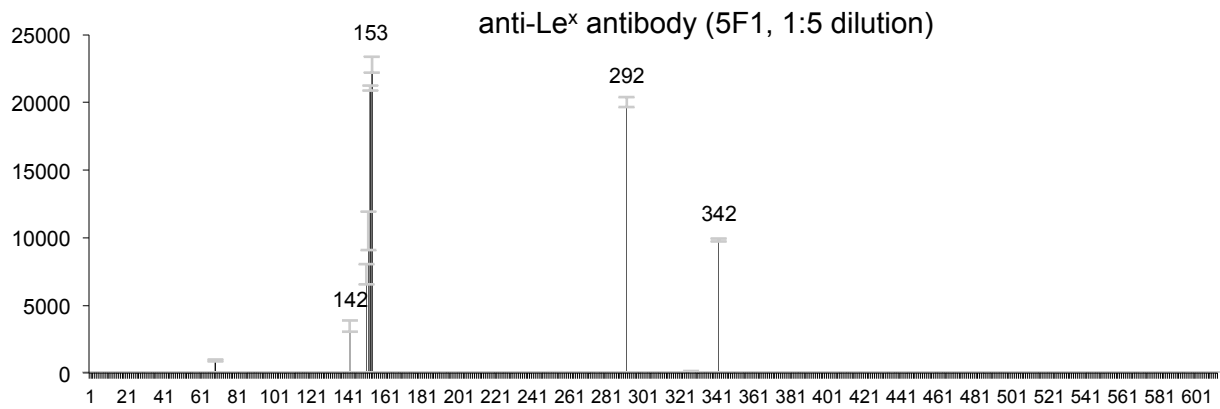

B.

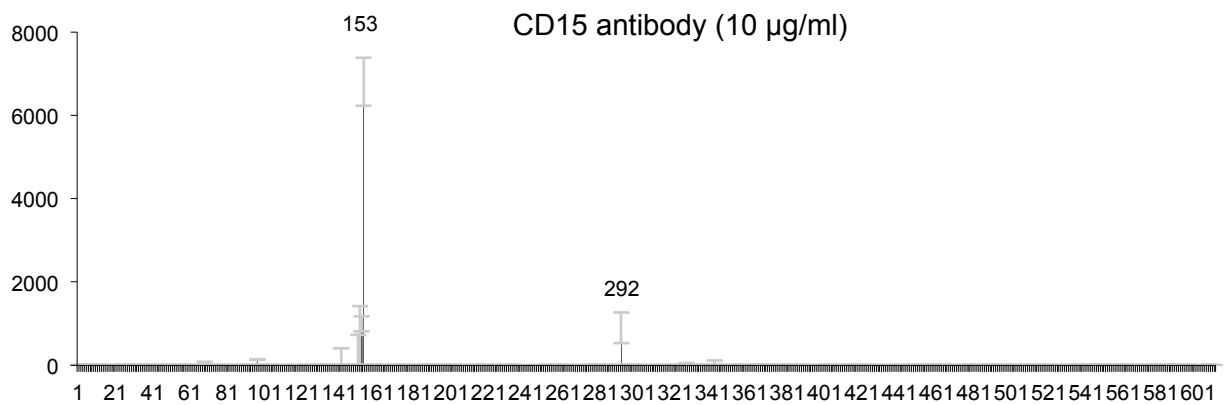

C.

| Chart Number | Structure                                                                        | 5F1   | CD15  |
|--------------|----------------------------------------------------------------------------------|-------|-------|
| 154          | Galb1-4(Fuca1-3)GlcNAcb1-3Galb1-4(Fuca1-3)GlcNAcb1-3Galb1-4(Fuca1-3)GlcNAcb-Sp0  | 22788 | 23816 |
| 153          | Galb1-4(Fuca1-3)GlcNAcb1-3Galb1-4(Fuca1-3)GlcNAcb-Sp0                            | 21062 | 23266 |
| 292          | Galb1-4(Fuca1-3)GlcNAcb1-3Galb1-3(Fuca1-4)GlcNAcb-Sp0                            | 20032 | 22746 |
| 152          | Galb1-4(Fuca1-3)GlcNAcb-Sp8                                                      | 10515 | 21166 |
| 342          | GlcNAca1-4Galb1-4GlcNAcb1-3Galb1-4(Fuca1-3)GlcNAcb1-3Galb1-4(Fuca1-3)GlcNAcb-Sp0 | 9830  | 22    |
| 151          | Galb1-4(Fuca1-3)GlcNAcb-Sp0                                                      | 7296  | 4     |
| 142          | Galb1-3GalNAcb-Sp8                                                               | 3464  | 11    |
| 69           | Fuca1-2Galb1-4(Fuca1-3)GlcNAcb1-3Galb1-4(Fuca1-3)GlcNAcb-Sp0                     | 931   | -1    |

|     |                                                                                                   |    |    |
|-----|---------------------------------------------------------------------------------------------------|----|----|
| 327 | Galb1-4(Fuca1-3)GlcNAcb1-2Mana1-6(Galb1-4(Fuca1-3)GlcNAcb1-2Mana1-3)Manb1-4GlcNAcb1-4GlcNAcb-Sp20 | 79 | -1 |
| 253 | Neu5Aca2-3Galb1-4(Fuca1-3)GlcNAcb1-3Galb1-4(Fuca1-3)GlcNAcb1-3Galb1-4(Fuca1-3)GlcNAcb-Sp0         | 54 | 1  |
| 126 | Galb1-3(Fuca1-4)GlcNAcb1-3Galb1-4(Fuca1-3)GlcNAcb-Sp0                                             | 23 | 5  |
| 383 | Galb1-4(Fuca1-3)GlcNAcb1-6(Galb1-3GlcNAcb1-3)Galb1-4Glc-Sp21                                      | 17 | 0  |
| 385 | Galb1-4(Fuca1-3)GlcNAcb1-6(Fuca1-4(Fuca1-2Galb1-3)GlcNAcb1-3)Galb1-4Glc-Sp21                      | 15 | 0  |
| 368 | Galb1-4(Fuca1-3)GlcNAcb1-6(Fuca1-2Galb1-4GlcNAcb1-3)Galb1-4Glc-Sp21                               | 11 | -2 |
| 447 | Galb1-4(Fuca1-3)GlcNAcb1-6GalNAc-Sp14                                                             | 9  | 3  |
| 161 | Galb1-4GlcNAcb1-3Galb1-4(Fuca1-3)GlcNAcb1-3Galb1-4(Fuca1-3)GlcNAcb-Sp0                            | 6  | 0  |
| 493 | Galb1-4(Fuca1-3)GlcNAcb1-6(Neu5Aca2-6(Neu5Aca2-3Galb1-3)GlcNAcb1-3)Galb1-4Glc-Sp21                | 4  | 2  |
| 127 | Galb1-3GlcNAcb1-3Galb1-4(Fuca1-3)GlcNAcb-Sp0                                                      | 3  | 0  |

D.

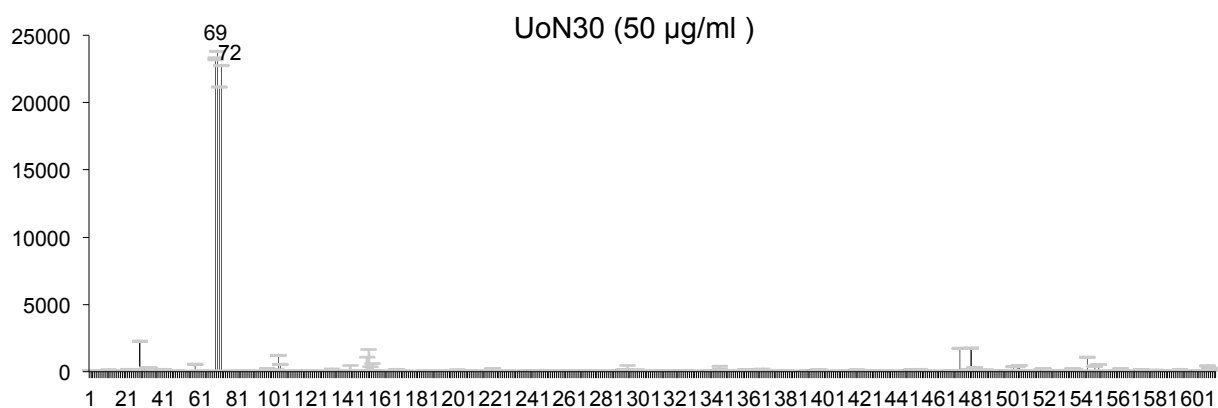

E.

| Chart Number | Structures of anti-Ley antibody binder                                                 | Average RFU |
|--------------|----------------------------------------------------------------------------------------|-------------|
| 70           | Fuca1-2Galb1-4(Fuca1-3)GlcNAcb1-3Galb1-4(Fuca1-3)GlcNAcb1-3Galb1-4(Fuca1-3)GlcNAcb-Sp0 | 23816       |
| 69           | Fuca1-2Galb1-4(Fuca1-3)GlcNAcb1-3Galb1-4(Fuca1-3)GlcNAcb-Sp0                           | 23266       |
| 72           | Fuca1-2Galb1-4(Fuca1-3)GlcNAcb-Sp8                                                     | 22746       |
| 71           | Fuca1-2Galb1-4(Fuca1-3)GlcNAcb-Sp0                                                     | 21166       |

Figure S6. Comparison the binding of VP8\*RV3 toward open-ring and close-ring glycan conjugates.

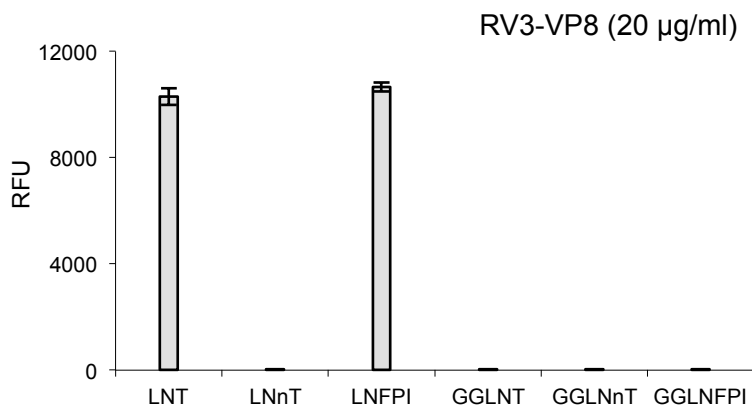

**Atypical binding of VP8\*RV3 with LNT and LNFP I** - The binding of HMG-5 (LNT) and HMG-8 (LNFP-I) seems inconsistent with the proposed requirement of an internal Lex fucose for VP8\* RV3 binding, but we feel that this interaction with VP8\* RV3 may be somewhat atypical. VP8\*RV3 binds primarily to type 1 glycans including LNT and LNFP I on HMG-SGM-v2 (**Fig. 4C-D**), however, neither of these glycans were bound when presented on the CFG array (**Table S2**) while the CFG array glycan #387 (identical to HMG-41/49) was bound. To explain this discrepancy we looked to the reducing end of these structures. The AEAB-conjugated glycans on HM-SGM-v2 generated by reductive amination have an open-ring structure, which means the reducing glucose of each HMG is not a glycoside. On the other hand, the glycans on CFG array were synthesized from glycosides and the reducing end of these glycans is a closed-ring structure. To determine if the inconsistency between the two arrays was due to the difference in the open and pyranose-ring structures, we prepared pyranose-ring AEAB-LNT, LNnT and LNFP I (56) and printed them on a slide in parallel with corresponding open-ring forms. Interrogation of these glycans with VP8\*RV3 indicated that this protein selectively recognized the open-ring LNT and LNFP I, but not the pyranose-ring forms (**Fig. S6**). Such observation suggests the binding of VP8\* to small glycans involves the reducing Glc in LNT (Gal $\beta$ 1-3GlcNAc $\beta$ 1-6Gal $\beta$ 1-4Glc). The protein does not bind when the Glc is in a glycosidic linkage, but does bind when presented as an open-ring Glc or substituted with a mannose (CFG 525, 527 and 528). While this may explain the anomalous behavior of VP8\* binding to these glycans, it points out the importance of understanding and evaluating glycan presentation and linkage when using glycan microarrays for interpretation of protein-glycan interactions.

Table S1. Reagents used for structural analysis.

(A) Binding specificity of lectins and antibodies used in MAGS

| <b>Lectin</b> | <b>Specificity</b>                                      | <b>Antibody</b>               | <b>Specificity</b>                                                  |
|---------------|---------------------------------------------------------|-------------------------------|---------------------------------------------------------------------|
| AAL           | L-fucose                                                | Anti-Le <sup>a</sup> antibody | Gal $\beta$ 1-3(Fuc $\alpha$ 1-4)GlcNAc $\beta$ 1-3                 |
| RCA-I         | [Neu5Ac $\alpha$ 2-6]Gal $\beta$ 1-4GlcNAc              | Anti-Le <sup>b</sup> antibody | Fuc $\alpha$ 1-2Gal $\beta$ 1-3(Fuc $\alpha$ 1-4)GlcNAc $\beta$ 1-3 |
| ECL           | Gal $\beta$ 1-4GlcNAc                                   | Anti-type-1 chain antibody    | Gal $\beta$ 1-3GlcNAc $\beta$ 1-3                                   |
| GSL-II        | GlcNAc                                                  | Anti-Le <sup>x</sup> antibody | Gal $\beta$ 1-4(Fuc $\alpha$ 1-3)GlcNAc $\beta$ 1-3                 |
| UEA-I         | Fuc $\alpha$ 1-2Gal $\beta$ 1-4[Fuc $\alpha$ 1-3]GlcNAc | Anti-CD15 antibody            | Gal $\beta$ 1-4(Fuc $\alpha$ 1-3)GlcNAc $\beta$ 1-3                 |

[ ]: Lectin recognizes determinant with or without the residue inside bracket

(B) The optimized conditions used for exoglycosidase treatments

| <b>Exoglycosidase</b>        | <b>Source</b>                   | <b>Manufacturer</b>      | <b>Working concentration*</b> | <b>pH</b> | <b>time (h)</b> |
|------------------------------|---------------------------------|--------------------------|-------------------------------|-----------|-----------------|
| $\beta$ 1-3 galactosidase    | <i>Xanthomonas manihotis</i>    | New England Biolabs      | 700 U/ml                      | 4.5       | 24              |
| $\beta$ 1-4 galactosidase    | Jack bean                       | Prozyme                  | 2 U/ml                        | 3.5       | 16              |
| Endo- $\beta$ -galactosidase | <i>Bacteroides fragilis</i>     | Boehringer Mannheim GmbH | 0.2 U/ml                      | 5.8       | 36              |
| neuraminidase                | <i>Arthrobacter ureafaciens</i> | Roche                    | 20 U/ml                       | 5.5       | < 3             |
| $\alpha$ 1,2-fucosidase      | unknown                         | Megazyme                 | 1 U/ml                        | 6.5       | 36              |

\* U is shown as manufacturer units.

Table S3. A summary of 260 glycan samples printed on the HMG-SGM, including obtained amount, mass and proposed composition.

| Fraction ID | obtained amount (nmol) | mass                         | composition |
|-------------|------------------------|------------------------------|-------------|
| HMG-1       | 120                    | 506.23                       | H2          |
| HMG-2       | 17                     | 652.11, 674.08               | H2F1        |
| HMG-3       | 389                    | 652.36                       | H2F1        |
| HMG-4       | 141                    | 854.61                       | ?           |
| HMG-5       | 16                     | 871.416                      | H3N1        |
| HMG-6       | 34                     | 871.41                       | H3N1        |
| HMG-7       | 68                     | 1017.513                     | H3N1F1      |
| HMG-8       | 120                    | 1017,                        | H3N1F1      |
| HMG-9       | 816                    | 1185.6                       | H3N1F2      |
| HMG-10      | 86                     | 1164.003                     | H3N1F2      |
| HMG-11      | 4                      | 1158.86                      | ?           |
| HMG-12      | 165                    | 1236.64, 1258.62             | H4N2        |
| HMG-13      | 14                     | 1236.828                     | H4N2        |
| HMG-14      | 4                      | 1236.828                     | H4N2        |
| HMG-15      | 311                    | 1258.66                      | H4N2        |
| HMG-16      | 171                    | 1236.72                      | H4N2        |
| HMG-17      | 7                      | 1309.79, 1331.77             | H3N1F3      |
| HMG-18      | 15                     | 1236.521                     | H4N2        |
| HMG-19      | 2090                   | 1382.739                     | H4N2F1      |
| HMG-20      | 227                    | 1382.866                     | H4N2F1      |
| HMG-21      | 6                      | 1404.957                     | H4N2F1      |
| HMG-22      | 134                    | 1405.151                     | H4N2F1      |
| HMG-23      | 8                      | 1550.951                     | H4N2F2      |
| HMG-24      | 172                    | 1529.95                      | H4N2F2      |
| HMG-25      | 12                     | 1529.275                     | H4N2F2      |
| HMG-26      | 52                     | 1529.159                     | H4N2F2      |
| HMG-27      | 21                     | 1236.28, 1248.273            | H4N2        |
| HMG-28      | 22                     | 1382.441, 1394.434, 1404.395 | H4N2F1      |
| HMG-29      | 40                     | 1404.395                     | H4N2F1      |
| HMG-30      | 167                    | 1382.441, 1394.434, 1404.395 | H4N2F1      |
| HMG-31      | 120                    | 1404.395                     | H4N2F1      |
| HMG-32      | 232                    | 1550.539                     | H4N2F2      |
| HMG-33      | 28                     | 1623.123                     | H5N3        |
| HMG-34      | 44                     | 1551.1                       | H4N2F2      |
| HMG-35      | 53                     | 1623.173                     | H5N3        |
| HMG-36      | 678                    | 1696.251                     | H4N2F3      |

| Fraction ID | obtained amount (nmol) | mass              | composition    |
|-------------|------------------------|-------------------|----------------|
| HMG-37      | 36                     | 1550.309          | H4N2F2         |
| HMG-38      | 19                     | 1696.268          | H4N2F3         |
| HMG-39      | 8                      | 1696.278          | H4N2F3         |
| HMG-40      | 97                     | 1696.359          | H4N2F3         |
| HMG-41      | 111                    | 1769.379, 1786.3  | H5N3F1         |
| HMG-42      | 8                      | 1842.95           | H4N2F4         |
| HMG-43      | 44                     | 1696.509          | H4N2F3         |
| HMG-44      | 49                     | 1769.367          | H5N3F1         |
| HMG-45      | 30                     | 1601.389, 1623.4  | H5N3           |
| HMG-46      | 35                     | 1684.42, 1696.402 | H4N2F3         |
| HMG-47      | 17                     | 1769.437          | H5N3F1         |
| HMG-48      | 28                     | 1769.437          | H5N3F1         |
| HMG-49      | 676                    | 1769.95           | H5N3F1         |
| HMG-50      | 18                     | 1759.678          | ?              |
| HMG-51      | 95                     | 1769.602          | H5N3F1         |
| HMG-52      | 52                     |                   | ?              |
| HMG-53      | 8                      | 1769.644          | H5N3F1         |
| HMG-54      | 25                     | 1915.95           | H5N3F2         |
| HMG-55      | 212                    | 1916.04           | H5N3F2         |
| HMG-56      | 45                     | 1894.17, 1916.09  | H5N3F2         |
| HMG-57      | 18                     | 1894.33           | H5N3F2         |
| HMG-58      | 36                     | 1894.11, 1916.09  | H5N3F2         |
| HMG-59      | 418                    | 1790, 1915.881    | H5N3F2         |
| HMG-60      | 76                     | 1894.22, 1916.08  | H5N3F2         |
| HMG-61      | 30                     | 1894.19           | H5N3F2         |
| HMG-62      | 12                     | 1916.08           | H5N3F2         |
| HMG-63      | 116                    | 2134.33           | H6N4F1         |
| HMG-64      | 269                    | 1988.297          | H6N4           |
| HMG-65      | 67                     | 1988.36           | H6N4           |
| HMG-66      | 55                     | 1988.385          | H6N4           |
| HMG-67      | 23                     | 1988.478          | H6N4           |
| HMG-68      | 91                     | 2061.44           | H5N3F3         |
| HMG-69      | 63                     | 2061.456          | H5N3F3         |
| HMG-70      | 476                    | 2061.582          | H5N3F3         |
| HMG-71      | 131                    | 2061.601          | H5N3F3         |
| HMG-72      | 234                    | 2280.649          | H6N4F2         |
| HMG-73      | 344                    | 2135.21           | H6N4F1         |
| HMG-74      | 134                    | 2281.33           | H6N4F2         |
| HMG-75      | 230                    | 2134.799, 2280    | H6N4F1, H6N4F2 |
| HMG-76      | 52                     | 2280.822          | H6N4F2         |



| Fraction ID | obtained amount (nmol) | mass                                    | composition                      |
|-------------|------------------------|-----------------------------------------|----------------------------------|
| HMG-77      | 18                     | 2280.721                                | H6N4F2                           |
| HMG-78      | 33                     | 2280.902                                | H6N4F2                           |
| HMG-79      | 193                    | 2280.818                                | H6N4F2                           |
| HMG-80      | 40                     | 2280.94                                 | H6N4F2                           |
| HMG-81      | 25                     | 2186.49, 2208.34                        | H5N3F4                           |
| HMG-82      | 9                      | 2208.54                                 | H5N3F4                           |
| HMG-83      | 15                     | 2208.53, 2427.63                        | H5N3F4, H6N4F3                   |
| HMG-84      | 75                     | 2208.56, 2427.66                        | H5N3F4, H6N4F3                   |
| HMG-85      | 32                     | 2427.72                                 | H6N4F3                           |
| HMG-86      | 124                    | 2427.7                                  | H6N4F3                           |
| HMG-87      | 41                     | 2355.56                                 | H7N5                             |
| HMG-88      | 7                      | 2573.85                                 | H6N4F4                           |
| HMG-89      | 901                    | 2280, 2426.9, 2501, 2645.97             | H6N4F2-3, H7N5F1-2               |
| HMG-90      | 1466                   | 2573, 2646, 2792.07, 2865, 3011         | H6N4F4, H7N5F2-3, H6N4F6, H8N6F2 |
| HMG-91      | 1401                   | 2792, 2939.2, 3011, 3118.29, 3159, 3337 | H7N5F3-4, H8N6F2-4               |
| HMG-92      | 1239                   | 3118, 3264.41, 3337, 3483               | H8N6F4                           |
| HMG-93      | 1119                   | 3410, 3483, 3629.58, 3775, 3849         | H9N7F4                           |
| HMG-94      | 752                    | 3776, 3922, 3994.95, 4142               | H10N8F4                          |
| HMG-95      | 351                    | 2239.21, 2385, 2458                     | ?                                |
| HMG-96      | 285                    | 1768.23, 2204, 2706, 2940               | H5N3F1, ?                        |
| HMG-97      | 335                    | 1525.945                                | H4N2S1                           |
| HMG-98      | 308                    | 1525.9                                  | H4N2S1                           |
| HMG-99      | 285                    | 1673                                    | H4N2F1S1                         |
| HMG-100     | 308                    | 1672.248                                | H4N2F1S1                         |
| HMG-101     | 1244                   | 1818.143                                | H4N2F2S1                         |
| HMG-102     | 20                     | 1818.351                                | H4N2F2S1                         |
| HMG-103     | 99                     | 1672.146                                | H4N2F1S1                         |
| HMG-104     | 987                    | 1160.713                                | H3N1S1                           |
| HMG-105     | 543                    | 1160.732                                | H3N1S1                           |
| HMG-106     | 36                     | 1172.389                                | H3N1S1                           |
| HMG-107     | 18                     | 1460.33                                 | ?                                |
| HMG-108     | 22                     | 1306.642                                | H3N1F1S1                         |
| HMG-109     | 36                     | 1306.862                                | H3N1F1S1                         |
| HMG-110     | 6                      | 1306.742                                | H3N1F1S1                         |
| HMG-111     | 10                     | 1306.761                                | H3N1F1S1                         |
| HMG-112     | 196                    | 1306.86                                 | H3N1F1S1                         |
| HMG-113     | 537                    | 1160.687                                | H3N1S1                           |
| HMG-114     | 574                    | 1306.812                                | H3N1F1S1                         |
| HMG-115     | 61                     | 1322.3                                  | H3N1F1S1                         |

| Fraction ID | obtained amount (nmol) | mass                | composition        |
|-------------|------------------------|---------------------|--------------------|
| HMG-116     | 60                     | 1468.42             | ?                  |
| HMG-117     | 213                    | 794.9               | H2S1               |
| HMG-118     | 1039                   | 794.9               | H2S1               |
| HMG-119     | 29                     | 1306.419, 1458.41   | H3N1F1S1           |
| HMG-120     | 8                      | 1525.73             | H4N2S1             |
| HMG-121     | 32                     | 1537.89             | H4N2S1             |
| HMG-122     | 644                    | 1671.708            | H4N2F1S1           |
| HMG-123     | 1467                   | 1525.84             | H4N2S1             |
| HMG-124     | 16                     | 1537.676            | H4N2S1             |
| HMG-125     | 45                     | 1525.719            | H4N2S1             |
| HMG-126     | 6                      | 1683.836            | H4N2F1S1           |
| HMG-127     | 410                    | 1525.852            | H4N2S1             |
| HMG-128     | 89                     | 1817.97, 1972, 2119 | H4N2F2S1, ?        |
| HMG-129     | 45                     | 1817.89, 1971.89    | H4N2F2S1, ?        |
| HMG-130     | 1141                   | 1671.85             | H4N2F1S1           |
| HMG-131     | 132                    | 1671.78             | H4N2F1S1           |
| HMG-132     | 1719                   | 1671.91             | H4N2F1S1           |
| HMG-133     | 34                     | 1306.67             | H3N1F1S1           |
| HMG-134     | 20                     | 1306.67             | H3N1F1S1           |
| HMG-135     | 172                    | 1818.11, 2184.32    | H4N2F2S1, H5N3F2S1 |
| HMG-136     | 53                     | 1672.14             | H4N2F1S1           |
| HMG-137     | 63                     | 1818.18             | H4N2F2S1           |
| HMG-138     | 19                     | 1672                | H4N2F1S1           |
| HMG-139     | 75                     | 1672.07             | H4N2F1S1           |
| HMG-140     | 1390                   | 1672.01             | H4N2F1S1           |
| HMG-141     | 10                     | 1525.84             | H4N2S1             |
| HMG-142     | 15                     | 2037.033            | H5N3F1S1           |
| HMG-143     | 22                     | 2037.128            | H5N3F1S1           |
| HMG-144     | 38                     | 2183.265            | H5N3F2S1           |
| HMG-145     | 27                     | 2183.249            | H5N3F2S1           |
| HMG-146     | 76                     | 2037.22             | H5N3F1S1           |
| HMG-147     | 17                     | 2183.25             | H5N3F2S1           |
| HMG-148     | 142                    | 2036.8              | H5N3F1S1           |
| HMG-149     | 21                     | 2182.936            | H5N3F2S1           |
| HMG-150     | 123                    | 2182.888            | H5N3F2S1           |
| HMG-151     | 39                     | 1525.97             | H4N2S1             |
| HMG-152     | 2                      | 2037.33             | H5N3F1S1           |
| HMG-153     | 24                     | 1683.865            | H4N2F1S1           |
| HMG-154     | 38                     | 2037.263            | H5N3F1S1           |
| HMG-155     | 14                     | 2036.986            | H5N3F1S1           |

| Fraction ID | obtained amount (nmol) | mass             | composition        |
|-------------|------------------------|------------------|--------------------|
| HMG-156     | 29                     | 2183.045         | H5N3F2S1           |
| HMG-157     | 5                      | 881.27, 1127.42  | H2F2S1 ?           |
| HMG-158     | 442                    | 1160.32, 1172.33 | H3N1S1             |
| HMG-159     | 113                    | 1160.39          | H3N1S1             |
| HMG-160     | 4                      | 2036.64          | H5N3F1S1           |
| HMG-161     | 33                     | 2182.95          | H5N3F2S1           |
| HMG-162     | 62                     | 2036.7           | H5N3F1S1           |
| HMG-163     | 22                     | 1671.68          | H4N2F1S1           |
| HMG-164     | 29                     | 2036.8           | H5N3F1S1           |
| HMG-165     | 22                     | 2036.89          | H5N3F1S1           |
| HMG-166     | 23                     | 2036.87          | H5N3F1S1           |
| HMG-167     | 41                     | 2036.86          | H5N3F1S1           |
| HMG-168     | 83                     | 2036.92          | H5N3F1S1           |
| HMG-169     | 80                     | 2036.9           | H5N3F1S1           |
| HMG-170     | 9                      | 2048.91          | H5N3F1S1           |
| HMG-171     | 129                    | 1890.87          | H5N3S1             |
| HMG-172     | 30                     | 2183.46          | H5N3F2S1           |
| HMG-173     | 33                     | 2256.51          | H6N4S1             |
| HMG-174     | 9                      | 2037.1           | H5N3F1S1           |
| HMG-175     | 112                    | 2037.28          | H5N3F1S1           |
| HMG-176     | 28                     | 2183.35          | H5N3F2S1           |
| HMG-177     | 95                     | 2183.23          | H5N3F2S1           |
| HMG-178     | 51                     | 2183.28          | H5N3F2S1           |
| HMG-179     | 193                    | 2037.18          | H5N3F1S1           |
| HMG-180     | 54                     | 2402.43          | H6N4F1S1           |
| HMG-181     | 56                     | 2049.51          | H6N4F1S1           |
| HMG-182     | 141                    | 2183.46          | H5N3F2S1           |
| HMG-183     | 11                     | 2256.59          | H6N4S1             |
| HMG-184     | 22                     | 2182.89          | H5N3F2S1           |
| HMG-185     | 7                      | 2255.98          | H6N4S1             |
| HMG-186     | 73                     | 2401.93          | H6N4F1S1           |
| HMG-187     | 94                     | 2328.92          | H5N3F3S1           |
| HMG-188     | 22                     | 2182.93          | H5N3F2S1           |
| HMG-189     | 17                     | 2329.1           | H5N3F3S1           |
| HMG-190     | 29                     | 2183.04          | H5N3F2S1           |
| HMG-191     | 152                    | 2183.03          | H5N3F2S1           |
| HMG-192     | 6                      | 2183.1, 2549.34  | H5N3F2S1, H6N4F2S1 |
| HMG-193     | 80                     | 2256.1           | H6N4S1             |
| HMG-194     | 38                     | 2256.11          | H6N4S1             |
| HMG-195     | 45                     | 2402.24          | H6N4F1S1           |

| Fraction ID | obtained amount (nmol) | mass                     | composition                |
|-------------|------------------------|--------------------------|----------------------------|
| HMG-196     | 32                     | 2183.15                  | H5N3F2S1                   |
| HMG-197     | 7                      | 2329.45, 2548.58         | H5N3F3S1, H6N4F2S1         |
| HMG-198     | 13                     | 2548.56                  | H6N4F2S1                   |
| HMG-199     | 121                    | 2548.44                  | H6N4F2S1                   |
| HMG-200     | 49                     | 2402.36                  | H6N4F1S1                   |
| HMG-201     | 70                     | 2548.52                  | H6N4F2S1                   |
| HMG-202     | 788                    | 2183.38                  | H5N3F2S1                   |
| HMG-203     | 214                    | 2402.48                  | H6N4F1S1                   |
| HMG-204     | 59                     | 2402.47                  | H6N4F1S1                   |
| HMG-205     | 39                     | 2402.56                  | H6N4F1S1                   |
| HMG-206     | 86                     | 2547.972                 | H6N4F2S1                   |
| HMG-207     | 93                     | 2548.65                  | H6N4F2S1                   |
| HMG-208     | 2460                   | 1473.636                 | H3N1S2                     |
| HMG-209     | 74                     | 1631.644                 | H3N1F1S2                   |
| HMG-210     | 21                     | 1580.63                  | H3N1F1S2-H2O               |
| HMG-211     | 6                      | 1838.69                  | H4N2S2                     |
| HMG-212     | 7                      | 2038, 2182.22            | H5N3S2                     |
| HMG-213     | 8                      | 1485.49                  | H3N1S2                     |
| HMG-214     | 7                      | 1945.4                   | H4N2F1S2-H2O               |
| HMG-215     | 26                     | 1962.39, 949.13          | H4N2F1S2                   |
| HMG-216     | 30                     | 1946.8                   | H4N2F1S2-H2O               |
| HMG-217     | 39                     | 1816.67                  | H4N2S2                     |
| HMG-218     | 210                    | 1671.67, 1944.59         | H4N2F1S2-H2O               |
| HMG-219     | 3                      | 2121.15                  | H4N2F2S2                   |
| HMG-220     | 42                     | 2225.8, 2473.58          | H5N3S2, H5N3F2S2           |
| HMG-221     | 19                     | 2458.7                   | H5N3F2S2-H2O               |
| HMG-222     | 196                    | 1525.644, 1838.727       | H4N2S2                     |
| HMG-223     | 95                     | 1671.878, 1963.05        | H4N2F1S2                   |
| HMG-224     | 26                     | 1891.035, 2182.229       | H5N3S2                     |
| HMG-225     | 19                     | 1525.933, 1839.06        | H4N2S2                     |
| HMG-226     | 26                     | 1962.91, 2183.16, 2474.7 | H4N2F1S2, H5N3S2, H5N3F2S2 |
| HMG-227     | 41                     | 2183.53, 2225.543        | H5N3S2                     |
| HMG-228     | 20                     | 2182.44                  | H5N3S2                     |
| HMG-229     | 54                     | 2078.885, 2350.176       | H5N3F1S2                   |
| HMG-230     | 23                     | 2311.25                  | H5N3F1S2                   |
| HMG-231     | 13                     | 2530.91                  | H6N4S2-H2O                 |
| HMG-232     | 51                     | 1984.6                   | H4N2F1S2                   |
| HMG-233     | 59                     | 2182.46, 2473.55         | H5N3S2, H5N3F2S2           |
| HMG-234     | 36                     | 2328.57                  | H5N3F1S2                   |
| HMG-235     | 178                    | 2281, 2500.31            | H6N4S1, H5N3F4S1           |

| Fraction ID | obtained amount (nmol) | mass                          | composition                                                                                 |
|-------------|------------------------|-------------------------------|---------------------------------------------------------------------------------------------|
| HMG-236     | 259                    | 1490.6, 1973.7                | H3N1F2S1, ?                                                                                 |
| HMG-237     | 184                    | 2792.6, 3011.8                | H7N5F1S1, H8N6S1                                                                            |
| HMG-238     | 88                     |                               | ?                                                                                           |
| HMG-239     | 50                     | 2080.69, 2493                 | H5N3F1S1, ?                                                                                 |
| HMG-240     | 216                    | 1910, 2461.15, 3220.2, 3833.8 | ?                                                                                           |
| HMG-241     | 19                     | 1802, 1946                    | ?                                                                                           |
| HMG-242     | 422                    | 1970, 2446, 2791.1            | H6N4F1S1, H7N5F1S1                                                                          |
| HMG-243     | 720                    |                               | ?                                                                                           |
| HMG-244     | 158                    | 1939, 2477.9, 2728, 3162      | H5N3F2S2, ?                                                                                 |
| HMG-245     | 103                    | 2416.6, 3772.36               | ?                                                                                           |
| HMG-246     | 769                    | 2124, 2368.9, 2619, 2903      | ?                                                                                           |
| HMG-247     | 218                    | 2060.574, 2246.6              | H5N3F1S1, ?                                                                                 |
| HMG-248     | 3FL                    |                               | Gal $\beta$ 1-4(Fuca1-3)Glc                                                                 |
| HMG-249     | LNT                    |                               | Gal $\beta$ 1-3GlcNAc $\beta$ 1-3Gal $\beta$ 1-4Glc                                         |
| HMG-250     | LNT                    |                               | Gal $\beta$ 1-4GlcNAc $\beta$ 1-3Gal $\beta$ 1-4Glc                                         |
| HMG-251     | LNFP1                  |                               | Fuca1-2Gal $\beta$ 1-3GlcNAc $\beta$ 1-3Gal $\beta$ 1-4Glc                                  |
| HMG-252     | LNFP2                  |                               | Gal $\beta$ 1-3(Fuca1-4)GlcNAc $\beta$ 1-3Gal $\beta$ 1-4Glc                                |
| HMG-253     | LDFT                   |                               | Fuca1-2Gal $\beta$ 1-4(Fuca1-3)Glc                                                          |
| HMG-254     | LNDP1                  |                               | Fuca1-2Gal $\beta$ 1-3(Fuca1-4)GlcNAc $\beta$ 1-3Gal $\beta$ 1-4Glc                         |
| HMG-255     | LSTa                   |                               | Neu5Ac $\alpha$ 2-3Gal $\beta$ 1-3GlcNAc $\beta$ 1-3Gal $\beta$ 1-4Glc                      |
| HMG-256     | LSTb                   |                               | Gal $\beta$ 1-3(Neu5Ac $\alpha$ 2-3)GlcNAc $\beta$ 1-3Gal $\beta$ 1-4Glc                    |
| HMG-257     | LSTc                   |                               | Neu5Ac $\alpha$ 2-6Gal $\beta$ 1-4GlcNAc $\beta$ 1-3Gal $\beta$ 1-4Glc                      |
| HMG-258     | Sialyl Lea             |                               | Neu5Ac $\alpha$ 2-3Gal $\beta$ 1-3(Fuca1-4)GlcNAc $\beta$ 1-3Gal $\beta$ 1-4Glc             |
| HMG-259     | DSLNT                  |                               | Neu5Ac $\alpha$ 2-3Gal $\beta$ 1-3(Neu5Ac $\alpha$ 2-6)GlcNAc $\beta$ 1-3Gal $\beta$ 1-4Glc |
| HMG-260     | Biotin                 |                               |                                                                                             |

Table S4. Plant lectins and antibodies binding HM-SGM-v2, showing data for Fig. 2 and Fig. 3 in tabular form.

| Chart ID | Sample ID | AAL       |         | RCA-I (10 ug/ml) |       | ECL      | SNA      | UEA-I    | anti-Type1 | anti-H1 | anti-Lea | anti-Leb | anti-Lex | GM35    | CD15     | Cslex    | anti-Ley |
|----------|-----------|-----------|---------|------------------|-------|----------|----------|----------|------------|---------|----------|----------|----------|---------|----------|----------|----------|
|          |           | 0.1 µg/ml | 1 µg/ml | Alexa488         | Cy5   | 10 µg/ml | 10 µg/ml | 10 µg/ml | unknown    | 1:10    | 20 µg/ml | 10 µg/ml | 1:20     | 5 µg/ml | 10 µg/ml | 20 µg/ml | 50 µg/ml |
| 1        | HMG-1     | 1         | -58     | 226              | 1249  | 23       | 9        | -31      | 15         | -70     | 1        | 22       | 9        | 19      | 22       | 79       | 9        |
| 2        | HMG-2     | 32545     | 62006   | 115              | 296   | 5        | 468      | -3       | 10         | -291    | 4        | 159      | 11       | 14      | 15       | 10       | 11       |
| 3        | HMG-3     | 37270     | 61447   | -15              | 40    | 51       | 151      | 10085    | 12         | -99     | 4        | -263     | 16       | 77      | 14       | 44       | 12       |
| 4        | HMG-4     | -37       | 273     | 39               | 105   | 8        | -130     | -60      | 11         | -265    | 2        | -370     | 10       | 15      | 10       | 30       | 4        |
| 5        | HMG-5     | 41        | -77     | 444              | 268   | 6        | -43      | -58      | 13676      | 57      | 43       | 40       | 18       | 16      | 11       | 39       | 9        |
| 6        | HMG-6     | -39       | -99     | 7453             | 27405 | 9792     | -60      | -67      | 11         | 49      | 0        | 32       | 19       | 31      | 17       | -14      | 6        |
| 7        | HMG-7     | 7580      | 54099   | 8                | 21    | 11       | -66      | 312      | 9          | 47      | 46940    | 4329     | 98       | 41      | 17       | 60       | 12       |
| 8        | HMG-8     | 1542      | 49904   | 9                | 41    | 4        | -28      | 50       | 5498       | 42314   | 0        | 44       | 155      | 35      | 16       | 16       | 6        |
| 9        | HMG-9     | 3983      | 55551   | 7                | 28    | 12       | -40      | -8       | 18         | -114    | 2        | 62533    | 17       | 26      | 13       | 148      | 10       |
| 10       | HMG-10    | 3976      | 45275   | 77               | 503   | 8        | 17       | -25      | 8          | -163    | 3        | 44400    | 25       | 19      | 23       | 14       | 15       |
| 11       | HMG-11    | -44       | 4397    | 5                | 28    | 1        | 3        | -25      | 13         | -219    | 13       | -17      | 8        | 21      | 19       | 16       | 3        |
| 12       | HMG-12    | -71       | -15     | 9463             | 56198 | 15300    | -37      | -20      | 18923      | -137    | 53       | 239      | 13       | 37      | 12       | 77       | 19       |
| 13       | HMG-13    | 31        | -23     | 439              | 19390 | 15       | 30       | -19      | 16931      | 61      | 175      | 51       | 18       | 38      | 25       | 39       | 9        |
| 14       | HMG-14    | 8         | -8      | 12886            | 51485 | 22895    | -43      | -17      | 11         | 34      | 4        | 30       | 9        | 62      | 14       | -4       | 3        |
| 15       | HMG-15    | 3         | 20      | 7485             | 34820 | 8582     | -18      | 90       | 13742      | 27      | 108      | 31       | 17       | 26      | 15       | 15       | 2        |
| 16       | HMG-16    | -4        | 14      | 11759            | 57303 | 36690    | 57       | 45       | 13         | 25      | 3        | 29       | 77       | 10      | 16       | 12       | 8        |
| 17       | HMG-17    | 33558     | 61016   | 4                | 49    | 43       | 425      | 40       | 14         | -24     | 14       | 60818    | 9        | 61      | 21       | 23       | 14       |
| 18       | HMG-18    | -26       | 52      | 12575            | 59403 | 27874    | -37      | -24      | 17         | -322    | 6        | 21       | 9        | 25      | 15       | 59       | 13       |
| 19       | HMG-19    | 5168      | 56505   | 338              | 794   | 19       | -60      | -23      | 19202      | -286    | 313      | -117     | 161      | 9       | 24       | 41       | 9        |
| 20       | HMG-20    | 4201      | 57135   | 9570             | 59213 | 20632    | -50      | -10      | 16         | -159    | 35       | 290      | 147      | 15      | 41       | 105      | 9        |
| 21       | HMG-21    | 6212      | 57600   | 262              | 24696 | 1750     | -6       | -26      | 14         | 90      | 54097    | 2074     | 59587    | 34      | 2768     | 54       | 25       |
| 22       | HMG-22    | 1232      | 45109   | 5916             | 11595 | 2268     | 13       | -39      | 10         | 26      | 715      | 86       | 587      | 26      | 25       | 23       | 21       |
| 23       | HMG-23    | 692       | 44948   | 9850             | 57180 | 19585    | -11      | 23       | 236        | 29      | 39       | 51       | 20       | 72      | 15       | 16       | 11       |
| 24       | HMG-24    | 11324     | 56452   | 48               | 175   | 20       | -4       | 20       | 9          | 43      | 43293    | 46444    | 3400     | 26      | 78       | 18       | 19       |
| 25       | HMG-25    | 12948     | 61072   | 5                | 33    | 8        | 60       | -14      | 17         | -166    | 71       | 17       | 56141    | 29      | 25624    | 46       | 74       |
| 26       | HMG-26    | 18267     | 58403   | 6                | 30    | 4        | 57       | 60       | 13         | -356    | 53008    | 3792     | 13       | 28      | 19       | 43       | 11       |
| 27       | HMG-27    | -32       | 279     | 595              | 23582 | 59       | -48      | -4       | 21485      | -309    | 246      | -134     | 14       | 23      | 11       | 97       | 4        |
| 28       | HMG-28    | 18675     | 58887   | 3                | 21133 | -15      | -28      | 35       | 24         | 9392    | 54101    | 1853     | 13342    | 31      | 38       | 35       | 16       |
| 29       | HMG-29    | 1606      | 54332   | 4                | 721   | 12       | -31      | -39      | 6016       | 54176   | 9        | 52       | 15       | 7       | 19       | 12       | 8        |
| 30       | HMG-30    | 1880      | 53698   | 7815             | 15624 | 3055     | -77      | -30      | 10         | 45      | 45415    | 4480     | 18       | 17      | 5        | 25       | 5        |
| 31       | HMG-31    | 329       | 42220   | 8137             | 33797 | 6426     | -16      | 7        | 1122       | 52      | 549      | 49       | 27       | 27      | 16       | 14       | 17       |
| 32       | HMG-32    | 14064     | 56200   | 22               | 38    | 26       | 78       | 13       | 17         | 41      | 2106     | 20125    | 60086    | 18      | 28484    | 17       | 59       |
| 33       | HMG-33    | 17        | 1372    | 2892             | 26252 | 55       | -54      | -45      | 21664      | -55     | 1245     | -10      | 12       | 30      | 12       | 37       | 10       |
| 34       | HMG-34    | 6015      | 57596   | 10               | 14    | 27       | 45       | -12      | 14         | -282    | 7        | 58856    | 11       | 33      | 8        | 34       | 8        |
| 35       | HMG-35    | 28        | 12723   | 11909            | 58169 | 33222    | -12      | -5       | 23182      | -369    | 469      | -181     | 15       | -1      | 15       | 9        | 13       |
| 36       | HMG-36    | 16888     | 57249   | 3                | 18    | 32       | -3       | -18      | 12         | -267    | 47       | 53819    | 257      | 21      | 20       | 30       | 17       |
| 37       | HMG-37    | 740       | 49089   | 284              | 332   | 22       | -48      | -50      | 3139       | 55521   | 1483     | 61       | 9        | 31      | 22       | 25       | 3        |
| 38       | HMG-38    | 4649      | 56321   | 16               | 28    | 11       | 37       | 11269    | 2688       | 34956   | 305      | 447      | 18       | 14      | 15       | 9        | 1164     |
| 39       | HMG-39    | 23738     | 59957   | 6                | 38    | 1        | 56       | 10945    | 6          | 64      | 23108    | 220      | 7737     | 33      | 91       | 15       | 3517     |
| 40       | HMG-40    | 10380     | 54382   | 4                | 24    | 1254     | -46      | 8        | 10         | 116     | 754      | 53117    | 23       | 25      | 28       | 10       | 13       |
| 41       | HMG-41    | 1128      | 32968   | 3359             | 9830  | 219      | 6        | -59      | 18919      | -54     | 2319     | 36       | 15       | 23      | 11       | 35       | 10       |
| 42       | HMG-42    | 27164     | 58613   | 6                | 20    | 27       | 136      | 9925     | 12         | -311    | 7        | 49727    | 13       | 19      | 8        | 81       | 3105     |

|    |        | AAL   |       | RCA-I (10 ug/ml) |       | ECL   | SNA | UEA-I | anti-Type1 | anti-H1 | anti-Lea | anti-Leb | anti-Lex | GM35 | CD15  | Cslex | anti-Ley |
|----|--------|-------|-------|------------------|-------|-------|-----|-------|------------|---------|----------|----------|----------|------|-------|-------|----------|
|    |        |       |       |                  |       |       |     |       |            |         |          |          |          |      |       |       |          |
| 43 | HMG-43 | 38183 | 61669 | 3                | 45    | 32    | 706 | 868   | 15         | -418    | 49907    | 3558     | 24029    | 46   | 872   | 72    | 10       |
| 44 | HMG-44 | 4299  | 53738 | 1117             | 2692  | 68    | -45 | -44   | 22643      | -135    | 754      | -45      | 2102     | 29   | 33    | 34    | 7        |
| 45 | HMG-45 | 42    | 892   | 11455            | 61167 | 42796 | -68 | -42   | 155        | 60      | 21       | 26       | 22       | 22   | 10    | 15    | 3        |
| 46 | HMG-46 | 13180 | 56326 | 5                | 45    | 2291  | -33 | -9    | 17         | 171     | 343      | 54970    | 19       | 28   | 10    | 25    | 14       |
| 47 | HMG-47 | 186   | 35009 | 9570             | 59781 | 32295 | -45 | -5    | 12         | 36      | 55       | 54       | 63       | 28   | 17    | 14    | 14       |
| 48 | HMG-48 | 1738  | 42389 | 9067             | 55699 | 10158 | -14 | -5    | 14606      | 24      | 859      | 34       | 25       | 20   | 21    | 12    | 8        |
| 49 | HMG-49 | 378   | 28695 | 4689             | 12996 | 189   | -8  | -60   | 19939      | -49     | 1011     | 48       | 12       | 17   | 11    | 45    | 12       |
| 50 | HMG-50 | 18406 | 61542 | 996              | 3098  | 140   | -19 | -8    | 51         | -241    | 55447    | 4051     | 122      | 49   | 30    | 61    | 8        |
| 51 | HMG-51 | 11268 | 55631 | 8096             | 24392 | 9270  | -46 | -31   | 4637       | 53705   | 50848    | 371      | 12       | 20   | 22    | 52    | 17       |
| 52 | HMG-52 | 13293 | 59038 | 10832            | 52504 | 19790 | -32 | -55   | 15         | -189    | 53349    | 1709     | 2702     | 11   | 29    | 78    | 28       |
| 53 | HMG-53 | 17654 | 59108 | 10478            | 37377 | 17902 | -46 | -25   | 19         | 59      | 55390    | 1591     | 48595    | 30   | 118   | 52    | 63       |
| 54 | HMG-54 | 1079  | 51630 | 10588            | 48265 | 9191  | -74 | -9    | 60         | 32      | 251      | 52       | 11       | 21   | 17    | 10    | 9        |
| 55 | HMG-55 | 9461  | 57098 | 1495             | 2259  | 70    | -49 | -8    | 13796      | 50      | 55595    | 3606     | 44       | 33   | 19    | 16    | 9        |
| 56 | HMG-56 | 7996  | 51502 | 156              | 94    | 24    | -43 | -6    | 13618      | 1917    | 417      | 36348    | 33       | 51   | 15    | 52    | 2        |
| 57 | HMG-57 | 15879 | 54721 | 9309             | 27088 | 2043  | 129 | 1     | 44         | -7      | 48768    | 1100     | 11       | 63   | 15    | 94    | 7        |
| 58 | HMG-58 | 6278  | 51156 | 96               | 302   | 7     | -28 | -16   | 15774      | -182    | 356      | 57       | 59454    | 23   | 24617 | 43    | 43       |
| 59 | HMG-59 | 15015 | 50809 | 159              | 308   | 15    | -12 | 9     | 15586      | -80     | 46664    | -155     | 52       | 28   | 15    | 97    | 7        |
| 60 | HMG-60 | 6364  | 54496 | 1121             | 1438  | 112   | -74 | -49   | 13946      | 48435   | 1305     | 55801    | 16       | 9    | 9     | 50    | 18       |
| 61 | HMG-61 | 15959 | 51569 | 145              | 220   | -10   | -36 | 26    | 15804      | 59      | 50356    | 3606     | 107      | 40   | 7     | 115   | 11       |
| 62 | HMG-62 | 788   | 49774 | 934              | 904   | 36    | -48 | -36   | 12919      | 62905   | 2228     | 50760    | 15       | 21   | 19    | 47    | 9        |
| 63 | HMG-63 | 2591  | 48263 | 2926             | 3207  | 184   | -64 | 15    | 18271      | 34      | 11756    | 79       | 90       | 35   | 17    | 15    | 5        |
| 64 | HMG-64 | -24   | 289   | 10767            | 42511 | 11776 | -73 | -41   | 16850      | 33      | 1893     | 6        | 29       | 13   | 12    | 13    | 2        |
| 65 | HMG-65 | 7465  | 54285 | 11684            | 59821 | 29878 | 0   | 12    | 14371      | -6      | 15399    | 106      | 21       | 41   | 22    | 8     | 12       |
| 66 | HMG-66 | 39    | 8915  | 11806            | 60760 | 59935 | 1   | -31   | 201        | -215    | 74       | 52       | 11       | 10   | 9     | 27    | 8        |
| 67 | HMG-67 | 23    | 7698  | 11492            | 61574 | 45144 | -86 | -11   | 21720      | 3090    | 1498     | -11      | 20       | 14   | 18    | 116   | 11       |
| 68 | HMG-68 | 18644 | 51658 | 4                | 53    | -3    | -8  | -40   | 11         | -355    | 42628    | -135     | 58221    | 61   | 18752 | 70    | 58       |
| 69 | HMG-69 | 2518  | 48527 | 1459             | 3068  | 33    | -75 | -55   | 6504       | 36      | 17781    | 55266    | 12095    | 38   | 109   | 74    | 10       |
| 70 | HMG-70 | 25138 | 53325 | 6                | 31    | 3     | -34 | 92    | 9          | 60      | 51691    | 7830     | 46882    | 21   | 1001  | 28    | 11       |
| 71 | HMG-71 | 23221 | 54522 | 4                | 28    | -4    | 15  | 44    | 11         | 104     | 52404    | 11292    | 30       | 44   | 16    | 23    | 6        |
| 72 | HMG-72 | 16075 | 56731 | 687              | 1107  | 44    | -35 | -16   | 10544      | 85      | 53493    | 2719     | 38       | 11   | 13    | 40    | 6        |
| 73 | HMG-73 | 9892  | 54997 | 11376            | 51115 | 11952 | -22 | -27   | 12405      | -13     | 53992    | 2768     | 10       | 21   | 12    | 27    | 11       |
| 74 | HMG-74 | 6082  | 52127 | 10708            | 50158 | 10369 | -19 | -26   | 17000      | -60     | 52229    | 1591     | 17       | 30   | 16    | 96    | 19       |
| 75 | HMG-75 | 1852  | 49291 | 3877             | 6647  | 253   | 15  | -65   | 21586      | -163    | 4267     | 102      | 81       | 12   | 17    | 41    | 8        |
| 76 | HMG-76 | 4591  | 48989 | 7785             | 23759 | 1216  | -88 | -55   | 19245      | -193    | 3081     | -125     | 36       | 28   | 13    | 42    | 11       |
| 77 | HMG-77 | 20091 | 57465 | 8312             | 35213 | 5097  | -66 | 2     | 809        | 330     | 54975    | 4814     | 12       | 37   | 15    | 19    | 8        |
| 78 | HMG-78 | 19835 | 55935 | 847              | 1944  | 70    | 8   | -33   | 2196       | 1747    | 50319    | 1098     | 756      | 61   | 14    | 3     | 18       |
| 79 | HMG-79 | 21627 | 53942 | 8737             | 20205 | 1804  | -40 | -17   | 393        | 24      | 52995    | 9582     | 57       | 39   | 21    | 66    | 16       |
| 80 | HMG-80 | 6816  | 53074 | 9484             | 24891 | 3385  | -37 | -8    | 11564      | 40188   | 151      | 156      | 13       | 45   | 16    | 25    | 9        |
| 81 | HMG-81 | 3475  | 52706 | 10595            | 25358 | 4905  | -6  | -9    | 7909       | 50      | 15353    | 52174    | 12       | 33   | 12    | 45    | 6        |
| 82 | HMG-82 | 17607 | 61048 | 6                | 26    | 2401  | 84  | -22   | 14         | -63     | 919      | 59272    | 35       | 47   | 27    | 29    | 15       |
| 83 | HMG-83 | 16579 | 55516 | 58               | 366   | 157   | 1   | -38   | 1515       | -119    | 27638    | 51920    | 6935     | 24   | 75    | 39    | 9        |
| 84 | HMG-84 | 11133 | 53174 | 5                | 50    | 709   | -57 | -37   | 853        | -100    | 1775     | 53613    | 11       | 10   | 14    | 15    | 26       |
| 85 | HMG-85 | 12149 | 54701 | 9697             | 21267 | 2713  | -60 | -21   | 424        | 1190    | 7634     | 61397    | 16       | 37   | 19    | 43    | 4        |
| 86 | HMG-86 | 4700  | 55356 | 5                | 16    | 17    | 4   | -37   | 11         | 50      | 53474    | 16413    | 143      | 28   | 15    | 60    | 6        |
| 87 | HMG-87 | 14991 | 52940 | 7                | 22    | 846   | -21 | 26    | 8          | 53      | 18       | 57842    | 26       | 45   | 14    | 21    | 4        |
| 88 | HMG-88 | 15249 | 57154 | 8209             | 11793 | 1084  | 189 | -28   | 10         | 100     | 681      | 57813    | 23       | 53   | 8     | 34    | 5        |
| 89 | HMG-89 | 15484 | 61570 | 16269            | 59893 | 14179 | 24  | 3     | 28498      | 7065    | 59672    | 18008    | 2101     | 65   | 50    | 25    | 11       |

|     |         | AAL   |       | RCA-I (10 ug/ml) |       | ECL  | SNA   | UEA-I | anti-Type1 | anti-H1 | anti-Lea | anti-Leb | anti-Lex | GM35  | CD15 | Cslex | anti-Ley |
|-----|---------|-------|-------|------------------|-------|------|-------|-------|------------|---------|----------|----------|----------|-------|------|-------|----------|
|     |         |       |       |                  |       |      |       |       |            |         |          |          |          |       |      |       |          |
| 90  | HMG-90  | 17440 | 58775 | 11074            | 26619 | 3045 | 11    | 40    | 14288      | 3610    | 63222    | 34988    | 24275    | 32    | 85   | 132   | 6        |
| 91  | HMG-91  | 15643 | 62325 | 9025             | 18380 | 1743 | -37   | -5    | 7280       | 3774    | 61014    | 39800    | 5544     | 37    | 30   | 30    | 6        |
| 92  | HMG-92  | 12815 | 61595 | 9161             | 18188 | 1632 | -80   | -28   | 5352       | 1826    | 59934    | 21579    | 3047     | 77    | 37   | 22    | 11       |
| 93  | HMG-93  | 10945 | 58737 | 9542             | 12557 | 821  | 31    | 3     | 2655       | 765     | 62186    | 13165    | 2448     | 3235  | 16   | 49    | 3        |
| 94  | HMG-94  | 12060 | 60316 | 11722            | 16690 | 898  | 1139  | 6     | 2817       | 535     | 51816    | 8479     | 4492     | 5908  | 34   | -10   | 9        |
| 95  | HMG-95  | 13490 | 60554 | 12567            | 21517 | 1252 | 2194  | 29    | 3826       | 314     | 59055    | 8697     | 3402     | 13694 | 13   | 30    | 11       |
| 96  | HMG-96  | 15031 | 63434 | 11295            | 25357 | 997  | 11052 | 48    | 1602       | 189     | 58691    | 4757     | 3330     | 12174 | 45   | 66    | 14       |
| 97  | HMG-97  | -4    | -23   | 7454             | 12506 | 13   | 25562 | -12   | 16490      | -59     | 32       | 34       | 15       | 37    | 10   | 65    | 7        |
| 98  | HMG-98  | -36   | -24   | 10021            | 54674 | 5698 | 25303 | -55   | 16         | -187    | 3        | 30       | 21       | 39    | 11   | 96    | 8        |
| 99  | HMG-99  | 4360  | 52753 | 5                | 29    | 28   | -67   | -81   | 17         | 3       | 5        | 37       | 104      | 53204 | 19   | 30    | 11       |
| 100 | HMG-100 | 5475  | 47572 | 2756             | 2346  | -10  | 37869 | -78   | 13         | -39     | 43009    | 888      | 15       | 5940  | 19   | 1     | 7        |
| 101 | HMG-101 | 3530  | 47308 | 6252             | 10267 | 13   | 48102 | -72   | 13         | 72      | 0        | 37       | 28       | 15    | 12   | 33    | 16       |
| 102 | HMG-102 | 935   | 37710 | 2005             | 1428  | -5   | 44709 | -14   | 11         | 67      | 3        | 48010    | 27       | 50    | 9    | 37    | 5        |
| 103 | HMG-103 | 4891  | 49790 | 5382             | 7933  | 24   | 44854 | -15   | 17         | 24      | 199      | 52       | 85       | 13467 | 29   | 26    | 9        |
| 104 | HMG-104 | -2    | -41   | 16               | 97    | -2   | -41   | -26   | 12         | 44      | 24       | 16       | 24       | 14    | 40   | 14    | 5        |
| 105 | HMG-105 | -35   | 182   | 4                | 59    | -6   | -15   | -79   | 18         | -113    | 10       | 107      | 9        | 56903 | 23   | 29    | 22       |
| 106 | HMG-106 | -21   | -43   | 5721             | 17632 | 9    | 47734 | -83   | 12         | -111    | 2        | 34       | 12       | 58    | 12   | 46    | 2        |
| 107 | HMG-107 | 1358  | 48326 | 380              | 550   | 40   | -54   | -74   | 18764      | -94     | 660      | -17      | 14       | 22    | 17   | -10   | 22       |
| 108 | HMG-108 | 29189 | 60485 | 9                | 38    | 17   | 510   | -65   | 22         | -283    | 28       | 36       | 17       | 44423 | 13   | 30    | 9        |
| 109 | HMG-109 | -32   | 3970  | -7               | 15    | 21   | -44   | -96   | 10         | 48      | 484      | 872      | 11       | 2     | 14   | 68    | 4        |
| 110 | HMG-110 | 409   | 24360 | 6                | 104   | 18   | 2     | 17    | 12         | 112     | 4        | 63       | 16       | 53    | 13   | 19    | 10       |
| 111 | HMG-111 | 30311 | 60712 | 13               | 168   | 40   | 502   | 15    | 13         | 15      | 58       | 84       | 24       | 26    | 13   | 24    | 5        |
| 112 | HMG-112 | 3175  | 57247 | 2                | 56    | 25   | -69   | -37   | 9          | 33      | 47       | 71       | 28       | 56214 | 9    | 34    | 36       |
| 113 | HMG-113 | -37   | 12    | 4164             | 3799  | 1    | 44256 | -98   | 14         | -62     | 3        | 3        | 11       | 71    | 15   | 11    | 18       |
| 114 | HMG-114 | 31210 | 60751 | 3705             | 2286  | -1   | 42878 | -54   | 12         | -414    | 3        | 61       | 8        | 17224 | 13   | 70    | 11       |
| 115 | HMG-115 | -15   | 81    | 6671             | 24206 | 21   | 36915 | -76   | 21         | -83     | 9        | -51      | 14       | 51    | 18   | -35   | 5        |
| 116 | HMG-116 | 2498  | 41    | 2                | 24    | -9   | -2    | -86   | 17         | -110    | 27       | 47       | 189      | 25    | 13   | 60    | 11       |
| 117 | HMG-117 | -51   | -57   | 5                | 36    | -1   | -67   | -77   | 15         | 30      | 5        | 20       | 16       | 28    | 12   | 22    | 5        |
| 118 | HMG-118 | -48   | -26   | 809              | 505   | 15   | 825   | -17   | 16         | 95      | 1        | 48       | 21       | 29    | 17   | 19    | 10       |
| 119 | HMG-119 | 298   | 29971 | 6                | 43    | -2   | 5     | 34    | 11         | -5      | 4603     | 2738     | 97       | 5280  | 19   | 13    | 9        |
| 120 | HMG-120 | -15   | -18   | 32               | 277   | 11   | -66   | 3     | 10         | 37      | 37       | 43       | 28       | 7     | 14   | 60    | 7        |
| 121 | HMG-121 | -12   | -46   | 8450             | 36797 | 6543 | 644   | -101  | 206        | 4       | 81       | 13       | 15       | 16    | 20   | 46    | 3        |
| 122 | HMG-122 | 1988  | 52143 | 16               | 203   | 49   | -12   | -57   | 21         | -208    | 154      | 35       | 41       | 32    | 23   | 23    | 10       |
| 123 | HMG-123 | -39   | -36   | 7899             | 16056 | 25   | 40807 | -60   | 14764      | -52     | 70       | 87       | 8        | 35    | 18   | 40    | 8        |
| 124 | HMG-124 | -40   | -6    | 10158            | 55718 | 50   | 49469 | -109  | 15780      | -57     | 36       | -87      | 15       | 38    | 13   | 123   | 2        |
| 125 | HMG-125 | -65   | 114   | 10395            | 59968 | 8380 | 38585 | -47   | 11         | 43      | 36       | 33       | 13       | 42    | 24   | 70    | 16       |
| 126 | HMG-126 | 1027  | 40183 | 56               | 103   | 22   | 84    | -6    | 11912      | 19      | 748      | 88       | 111      | 519   | 10   | 32420 | 6        |
| 127 | HMG-127 | -84   | 544   | 9517             | 59964 | 5147 | 47675 | 16    | 16         | 38      | 3        | 37       | 19       | 5     | 12   | 11    | 8        |
| 128 | HMG-128 | 9414  | 54265 | 5                | 51    | 27   | -37   | -25   | 10         | 43      | 413      | 48       | 107      | 60669 | 26   | 48    | 28       |
| 129 | HMG-129 | 7195  | 53092 | 7                | 48    | 25   | -27   | -64   | 121        | -43     | 1203     | 39       | 28       | 61386 | 22   | 30    | 22       |
| 130 | HMG-130 | 4829  | 48808 | 3658             | 4013  | 14   | 40641 | -82   | 13         | -119    | 44452    | 1217     | 19       | 2306  | 11   | 30    | 5        |
| 131 | HMG-131 | 2874  | 51616 | 5                | 61    | 23   | -77   | -110  | 48         | -294    | 25       | -42      | 90       | 55360 | 20   | 11    | 19       |
| 132 | HMG-132 | 4185  | 49419 | 6352             | 13767 | 22   | 47026 | -69   | 12         | -146    | 8        | 174      | 158      | 17    | 21   | 39    | 13       |
| 133 | HMG-133 | 1688  | 49613 | 8583             | 26790 | 9    | 51993 | -50   | 16         | 86      | 3        | 6        | 597      | -3    | 20   | 7     | 2        |
| 134 | HMG-134 | 28584 | 59267 | 3902             | 6229  | 27   | 49606 | 15    | 18         | 40      | 16       | 62       | 19       | 47    | 10   | 8     | 7        |
| 135 | HMG-135 | 6730  | 53067 | 8                | 86    | 12   | 135   | -6    | 14         | 18      | 12370    | 90       | 51       | 55594 | 16   | 29    | 16       |
| 136 | HMG-136 | 330   | 33957 | 3288             | 1762  | 0    | 40709 | -29   | 2546       | 1115    | 9        | 50       | 270      | 1598  | 23   | 7     | 4        |



|     |         | AAL   |       | RCA-I (10 ug/ml) |       | ECL   | SNA   | UEA-I | anti-Type1 | anti-H1 | anti-Lea | anti-Leb | anti-Lex | GM35  | CD15 | Cslex | anti-Ley |
|-----|---------|-------|-------|------------------|-------|-------|-------|-------|------------|---------|----------|----------|----------|-------|------|-------|----------|
| 137 | HMG-137 | 537   | 25466 | 2329             | 1523  | -8    | 41390 | -44   | 9          | -39     | 3        | 43370    | 24       | 23    | 6    | 45    | 6        |
| 138 | HMG-138 | 2599  | 54772 | 264              | 613   | -7    | 10762 | -52   | 18         | -289    | 548      | 178      | 69       | 38248 | 39   | 18    | 15       |
| 139 | HMG-139 | 159   | 22217 | 5918             | 5870  | -2    | 47683 | -68   | 14         | -153    | 8        | 5        | 19       | 27    | 6    | 27    | 11       |
| 140 | HMG-140 | 3835  | 55391 | 7906             | 11547 | 4     | 54782 | -66   | 11         | -74     | 10       | -38      | 235      | 8     | 45   | 18    | 6        |
| 141 | HMG-141 | -24   | 28    | 10432            | 60542 | 4567  | 49152 | -34   | 6          | 52      | 14       | 24       | 58       | 30    | 11   | 32    | 5        |
| 142 | HMG-142 | 294   | 26716 | 1692             | 3139  | 273   | -33   | -30   | 20852      | 52      | 491      | 85       | 36       | 58416 | 25   | 10    | 13       |
| 143 | HMG-143 | 2238  | 58740 | 11072            | 33156 | 45    | 61534 | -11   | 15         | 59      | 8        | 43       | 2063     | 21    | 37   | 13    | 6        |
| 144 | HMG-144 | 6032  | 62841 | 84               | 185   | 20    | 17    | -5    | 16675      | 80      | 9458     | 58       | 38       | 60237 | 20   | 34    | 4        |
| 145 | HMG-145 | 9864  | 60483 | 697              | 967   | -3    | 40309 | -29   | 13         | 9       | 59390    | 201      | 45       | 2328  | 56   | 51    | 8        |
| 146 | HMG-146 | -6    | 9821  | 11274            | 55150 | 28    | 56509 | -67   | 17491      | -244    | 279      | 19       | 33       | 23    | 20   | 20    | 5        |
| 147 | HMG-147 | 15869 | 58223 | 4                | 41    | -3    | -7    | -41   | 14         | -167    | 54746    | -26      | 164      | 58511 | 17   | 60    | 14       |
| 148 | HMG-148 | 482   | 27328 | 10556            | 61668 | 122   | 51066 | -50   | 19015      | -121    | 1116     | 470      | 16       | 26    | 11   | 46    | 5        |
| 149 | HMG-149 | 11382 | 56672 | 6410             | 10597 | 9     | 52987 | -27   | 19         | 70      | 54630    | 1555     | 23       | 9712  | 16   | 24    | 12       |
| 150 | HMG-150 | 15633 | 57535 | 6062             | 5528  | 34    | 53701 | -8    | 9          | 35      | 54017    | 1539     | 1907     | 24    | 74   | 17    | 6        |
| 151 | HMG-151 | -77   | -2    | 6663             | 13088 | 6     | 39936 | -15   | 16092      | 19      | 74       | 22       | 25       | 22    | 21   | 19    | 7        |
| 152 | HMG-152 | 409   | 31688 | 11439            | 60958 | 1636  | 56473 | 9     | 2455       | 21      | 53       | 4680     | 8        | 11    | 27   | 27    | 2        |
| 153 | HMG-153 | 588   | 40566 | 51               | 506   | 25    | -47   | -49   | 25         | -50     | 504      | 179      | 16       | 2315  | 41   | -10   | 12       |
| 154 | HMG-154 | 403   | 28715 | 1955             | 3219  | 56    | -35   | -50   | 18495      | -209    | 2695     | 22       | 17       | 513   | 18   | 55    | 3        |
| 155 | HMG-155 | 927   | 43068 | 2341             | 4201  | 39    | 23    | -48   | 4577       | -134    | 22988    | -119     | 20       | 6     | 11   | 25    | 5        |
| 156 | HMG-156 | 9614  | 56449 | 7                | 75    | 37    | -57   | -33   | 15         | -132    | 53277    | 703      | 319      | 37    | 9    | 23    | 5        |
| 157 | HMG-157 | -17   | -31   | 6                | 32    | 23    | 33    | -25   | 17         | 58      | 4        | 48       | 18       | 15150 | 11   | 55    | 4        |
| 158 | HMG-158 | -22   | -36   | 16               | 161   | 15    | -44   | -43   | 37         | 53      | 25       | 29       | 11       | 4586  | 34   | 31    | 11       |
| 159 | HMG-159 | -46   | 112   | 9                | 56    | 1     | -32   | -9    | 17         | 42      | 1        | 21       | 37       | 57723 | 26   | 21    | 14       |
| 160 | HMG-160 | 105   | 11602 | 516              | 1511  | 58    | 30    | 41    | 21072      | 54      | 541      | 29       | 13       | 24    | 31   | 56    | 5        |
| 161 | HMG-161 | 16501 | 61916 | 11               | 195   | 31    | -34   | 5     | 12         | -53     | 53826    | 1046     | 15       | 1     | 15   | 59    | 6        |
| 162 | HMG-162 | 10    | 8284  | 9885             | 55249 | 20    | 51948 | -44   | 18099      | -218    | 204      | 54       | 16       | 4     | 12   | 9     | 10       |
| 163 | HMG-163 | 184   | 28306 | 7715             | 18385 | -6    | 55990 | -9    | 25         | -208    | 59       | 41       | 23       | 25    | 14   | 16    | 6        |
| 164 | HMG-164 | 193   | 20886 | 2250             | 5310  | 81    | -35   | -23   | 19067      | -22     | 870      | -94      | 28       | 36    | 24   | 37    | 6        |
| 165 | HMG-165 | 738   | 38267 | 11777            | 59532 | 5799  | 53052 | 3     | 1844       | 48      | 202      | 66       | 17       | 17660 | 19   | 196   | 7        |
| 166 | HMG-166 | 874   | 36589 | 9290             | 27919 | 34    | 51109 | 7     | 17001      | 33      | 704      | 31       | 11       | 9404  | 16   | 70    | 6        |
| 167 | HMG-167 | 174   | 17371 | 942              | 1774  | 51    | -53   | -13   | 17752      | 45      | 3350     | 32       | 27       | 10    | 12   | 11    | 6        |
| 168 | HMG-168 | 428   | 27130 | 185              | 537   | 13    | -89   | -28   | 19950      | 35      | 543      | 29       | 19       | 59445 | 14   | 42    | 4        |
| 169 | HMG-169 | 712   | 33554 | 8320             | 27844 | 136   | 43490 | -13   | 20378      | -65     | 134      | 14       | 26       | 1583  | 14   | -21   | 3        |
| 170 | HMG-170 | 3281  | 46913 | 13581            | 58115 | 1603  | 60055 | -34   | 3908       | -188    | 18       | -1       | 73       | 18    | 11   | 47    | 2        |
| 171 | HMG-171 | -55   | -31   | 14660            | 61314 | 21099 | 59153 | -23   | 10         | -162    | 9        | -55      | 24       | 18    | 8    | 37    | 3        |
| 172 | HMG-172 | 3825  | 58284 | 82               | -3    | 21    | -55   | 28    | 23390      | -59     | 1166     | -5       | 11       | 30461 | 11   | -9    | 18       |
| 173 | HMG-173 | 11    | -10   | 5155             | 14109 | 3788  | -7    | 1     | 7677       | 38      | 95       | 31       | 21       | 7     | 10   | 16    | 4        |
| 174 | HMG-174 | 555   | 23795 | 212              | 756   | 48    | 368   | 5     | 74         | 36      | 8        | 38       | 47       | 41809 | 24   | 85    | 17       |
| 175 | HMG-175 | 1254  | 56040 | 8948             | 9352  | 30    | 60369 | 11    | 11         | 24      | 9        | 32       | 21       | 18    | 30   | 34    | 4        |
| 176 | HMG-176 | 10895 | 58199 | 10               | 12    | 4     | -43   | -39   | 90         | 33      | 6256     | 43       | 24359    | 1399  | 84   | 29    | 4        |
| 177 | HMG-177 | 3991  | 54243 | 102              | 135   | 16    | 9     | 29    | 20903      | -75     | 1219     | 18       | 19       | 59914 | 24   | 67    | 11       |
| 178 | HMG-178 | 16144 | 58020 | 1569             | 1131  | 4     | 47677 | -19   | 16         | -21     | 54310    | 240      | 31       | 6475  | 21   | 82    | 5        |
| 179 | HMG-179 | -5    | 8896  | 9934             | 52564 | 34    | 48403 | -26   | 18831      | 154     | 170      | 25       | 33       | 37    | 17   | 78    | 4        |
| 180 | HMG-180 | 1467  | 53289 | 11327            | 35702 | 5292  | -10   | -18   | 14249      | 232     | 6290     | 28       | 23       | 43128 | 19   | 133   | 13       |
| 181 | HMG-181 | 64    | 10257 | 7936             | 36781 | 176   | 41850 | 5     | 18618      | 33      | 67       | 19       | 22       | 27    | 12   | 53    | 3        |
| 182 | HMG-182 | 12783 | 60833 | 16               | 3     | 15    | -48   | 6     | 8          | 30      | 58773    | 1988     | 1688     | 32126 | 29   | 50    | 5        |
| 183 | HMG-183 | -13   | 49    | 6832             | 22138 | 789   | 18279 | 36    | 13851      | 8       | 48       | 52       | 13       | 26    | 25   | 46    | 6        |

|     |         | AAL   |       | RCA-I (10 ug/ml) |       | ECL  | SNA   | UEA-I | anti-Type1 | anti-H1 | anti-Lea | anti-Leb | anti-Lex | GM35  | CD15 | Cslex | anti-Ley |
|-----|---------|-------|-------|------------------|-------|------|-------|-------|------------|---------|----------|----------|----------|-------|------|-------|----------|
|     |         |       |       |                  |       |      |       |       |            |         |          |          |          |       |      |       |          |
| 184 | HMG-184 | 12047 | 57093 | 28               | 93    | 21   | -55   | -22   | 15         | 34      | 57595    | 2092     | 27       | 254   | 19   | 16    | 2        |
| 185 | HMG-185 | 15    | 50    | 7881             | 22937 | 793  | 18567 | 0     | 705        | -49     | 8        | 17       | 15       | 64    | 42   | 14    | 10       |
| 186 | HMG-186 | 1333  | 53626 | 212              | 513   | 16   | -24   | -3    | 25835      | -59     | 555      | 150      | 45       | 59068 | 17   | 9     | 3        |
| 187 | HMG-187 | 16510 | 57265 | 7                | 46    | 6    | 1278  | -23   | 11         | -135    | 52428    | 13628    | 19       | 60071 | 14   | 68    | 49       |
| 188 | HMG-188 | 4969  | 54394 | 6422             | 9895  | 10   | 50990 | -8    | 1007       | 1200    | 5198     | 205      | 26       | 2576  | 14   | 31    | 2        |
| 189 | HMG-189 | 6286  | 60375 | 19               | -46   | 27   | 4     | 15    | 13         | 32      | 25329    | 128      | 14314    | 61381 | 16   | 66    | 8        |
| 190 | HMG-190 | 5565  | 55705 | 8751             | 21182 | 15   | 55385 | -7    | 18         | 34      | 23       | 51       | 53       | 52    | 11   | 42    | 9        |
| 191 | HMG-191 | 9140  | 56283 | 5986             | 5617  | 32   | 50877 | 25    | 213        | 16      | 51953    | 1577     | 27       | 25    | 18   | 44    | 5        |
| 192 | HMG-192 | 17753 | 62669 | 1854             | 3123  | 30   | 28304 | 17    | 6          | 14      | 62458    | 1171     | 68       | 30701 | 15   | 22    | 3        |
| 193 | HMG-193 | 13    | 20    | 13396            | 60706 | 6581 | 56374 | -9    | 21848      | -25     | 11       | 22       | 14       | 25    | 21   | 16    | 4        |
| 194 | HMG-194 | -2    | 9     | 13467            | 60522 | 5911 | 50823 | -13   | 26109      | -86     | 124      | 11       | 19       | 11    | 7    | 40    | 6        |
| 195 | HMG-195 | 8553  | 58971 | 10392            | 32420 | 4740 | -52   | -16   | 12         | -188    | 55703    | 1949     | 30       | 57894 | 22   | 82    | 20       |
| 196 | HMG-196 | 873   | 49669 | 7686             | 24882 | 21   | 56664 | -20   | 15         | -57     | 22       | -21      | 40       | 43    | 13   | 39    | 8        |
| 197 | HMG-197 | 16608 | 61553 | 713              | 2238  | 153  | -32   | 21    | 71         | 50110   | 57528    | 5061     | 54       | 45611 | 21   | 26    | 13       |
| 198 | HMG-198 | 19938 | 60759 | 4222             | 3785  | 15   | 53842 | 12    | 12         | 42      | 59888    | 5717     | 13       | 121   | 12   | 35    | 4        |
| 199 | HMG-199 | 15825 | 61165 | 5915             | 12193 | 328  | 14980 | -12   | 48         | 56      | 56666    | 1535     | 46       | 60178 | 20   | 13    | 38       |
| 200 | HMG-200 | 1787  | 59617 | 8748             | 9159  | 45   | 53978 | 9     | 7679       | 65      | 61921    | 1027     | 10       | 14    | 37   | 41    | 3        |
| 201 | HMG-201 | 3637  | 61135 | 300              | 630   | 43   | -47   | -22   | 19391      | -45     | 6008     | 65       | 14       | 62249 | 20   | 71    | 16       |
| 202 | HMG-202 | 14613 | 58228 | 8553             | 23255 | 41   | 54184 | -5    | 13         | -65     | 53930    | 1733     | 944      | 20    | 24   | -5    | 6        |
| 203 | HMG-203 | 8803  | 43658 | 12308            | 62816 | 3256 | 53422 | -16   | 15         | -103    | 54782    | 1959     | 28       | 10    | 11   | 25    | 6        |
| 204 | HMG-204 | 664   | 32113 | 9856             | 33581 | 64   | 49889 | -26   | 20896      | -94     | 38       | 16       | 34       | 18    | 11   | 7     | 2        |
| 205 | HMG-205 | 646   | 44412 | 9270             | 18113 | 20   | 46853 | -18   | 24570      | 27      | 474      | 21       | 45       | 36    | 13   | 20    | 7        |
| 206 | HMG-206 | 10904 | 62228 | 7                | 27    | 26   | -45   | -35   | 10         | 49      | 60756    | 2266     | 181      | 63288 | 36   | 63    | 10       |
| 207 | HMG-207 | 11353 | 60960 | 3828             | 1429  | 8    | 51399 | -31   | 48         | 59      | 58350    | 2391     | 58       | 19    | 22   | 38    | 3        |
| 208 | HMG-208 | 4     | 14    | 7                | 98    | 9    | -74   | -10   | 28         | 44      | 2        | 37       | -7       | 61149 | 10   | 40    | 6        |
| 209 | HMG-209 | 60    | 13986 | 10               | 90    | 20   | -83   | -45   | 11         | -41     | 4        | 36       | 29       | 58959 | 17   | -3    | 11       |
| 210 | HMG-210 | -34   | 8085  | 6                | 82    | 10   | -79   | -36   | 14         | -48     | 34       | 52       | 19       | 59257 | 17   | 50    | 11       |
| 211 | HMG-211 | -13   | 14286 | 10               | 345   | -1   | -79   | -32   | 19         | -76     | 446      | -146     | 26       | 62307 | 17   | 51    | 11       |
| 212 | HMG-212 | 12250 | 61672 | 13               | 35    | 13   | 29    | -6    | 18         | -211    | 58212    | 920      | 194      | 57356 | 24   | 17    | 8        |
| 213 | HMG-213 | -62   | 37    | 12               | 86    | -7   | 3     | -16   | 19         | 56      | 6        | 71       | 480      | 49104 | 19   | 17    | 16       |
| 214 | HMG-214 | 2429  | 56727 | 7                | 61    | -4   | -51   | -65   | 13         | 21      | 31       | 25       | 171      | 13    | 12   | 15    | 5        |
| 215 | HMG-215 | 5     | 11343 | -2               | 42    | 2    | -114  | -54   | 30         | 56      | 123      | 56       | 18       | 27994 | 12   | 47    | 6        |
| 216 | HMG-216 | 1572  | 54408 | 6                | 28    | 12   | -31   | -66   | 10         | 45      | 175      | 29       | -84      | 35    | 19   | 84    | 7        |
| 217 | HMG-217 | -46   | 1114  | 4947             | 5655  | 13   | 41568 | -51   | 15         | 29      | 188      | 65       | 10       | 1423  | 19   | 76    | 10       |
| 218 | HMG-218 | 1873  | 56560 | 6                | 227   | 25   | -59   | -59   | 15         | -83     | 5        | 111      | 65       | 58631 | 17   | -3    | 5        |
| 219 | HMG-219 | 986   | 46372 | 5                | 118   | -7   | -60   | -53   | 21         | -164    | 609      | -115     | 18       | 62729 | 23   | 34    | 12       |
| 220 | HMG-220 | 11407 | 62547 | 4                | 99    | 13   | -54   | -54   | 43         | -101    | 56382    | 349      | 1007     | 59300 | 51   | 27    | 9        |
| 221 | HMG-221 | 4596  | 59246 | 42               | 369   | 23   | -53   | -33   | 5895       | 26      | 56000    | 190      | 25       | 41298 | 24   | 77    | 9        |
| 222 | HMG-222 | -78   | -80   | 8927             | 35532 | -20  | 53776 | -112  | 18         | 32      | 2        | 34       | 22       | 1     | 19   | 22    | 9        |
| 223 | HMG-223 | 1744  | 55623 | -38              | 124   | 3    | -224  | -91   | 14         | 57      | 13677    | 84       | 88       | 47328 | 80   | 111   | 10       |
| 224 | HMG-224 | -80   | -76   | 42               | 24    | -3   | -132  | -94   | 13636      | 86      | 2152     | 38       | 5        | 57764 | 20   | 77    | 6        |
| 225 | HMG-225 | -22   | -28   | 4417             | 4798  | 1416 | -82   | -68   | 28         | -19     | 21       | 85       | 25       | 43876 | 30   | 229   | 13       |
| 226 | HMG-226 | 4475  | 61057 | 7                | 96    | 4    | -87   | -73   | 16         | -15     | 57024    | 225      | 20       | 5132  | 11   | 59    | 4        |
| 227 | HMG-227 | 5890  | 60738 | 8                | 156   | -4   | 197   | -59   | 20         | -202    | 57789    | 769      | 27       | 51748 | 12   | 17    | 6        |
| 228 | HMG-228 | 14125 | 58185 | 13               | 107   | -12  | -48   | -55   | 16         | -166    | 54776    | 6        | 2199     | 19    | 30   | 15    | 8        |
| 229 | HMG-229 | 14    | 27299 | 9932             | 18819 | -23  | 59304 | -67   | 14         | 37      | 876      | 39       | 18       | 2793  | 33   | 11    | 4        |
| 230 | HMG-230 | 103   | 23171 | 17               | 337   | 16   | -113  | -109  | 13288      | 39      | 3214     | 22       | 8        | 20156 | 28   | 27    | 3        |

|     |            | AAL   |       | RCA-I (10 ug/ml) |       | ECL   | SNA   | UEA-I | anti-Type1 | anti-H1 | anti-Lea | anti-Leb | anti-Lex | GM35  | CD15 | Cslex | anti-Ley |
|-----|------------|-------|-------|------------------|-------|-------|-------|-------|------------|---------|----------|----------|----------|-------|------|-------|----------|
|     |            |       |       |                  |       |       |       |       |            |         |          |          |          |       |      |       |          |
| 231 | HMG-231    | 7     | 900   | 7792             | 8654  | 2111  | -268  | -58   | 7868       | 77      | 1512     | 41       | 24       | 53880 | 19   | 42    | 5        |
| 232 | HMG-232    | -10   | 10808 | -18              | 39    | -11   | -147  | -119  | 1634       | 38      | 61       | 27       | -17      | 32790 | 17   | 15    | 71       |
| 233 | HMG-233    | 12011 | 60612 | 7                | 82    | 1     | -46   | -22   | 18         | -37     | 56927    | 835      | 2085     | 53679 | 10   | 33    | 7        |
| 234 | HMG-234    | 553   | 44552 | 185              | 814   | 32    | -55   | -74   | 21996      | -44     | 14926    | 62       | 16       | 54884 | 5    | 18    | 3        |
| 235 | HMG-235    | 4476  | 62176 | 9241             | 31578 | 662   | 8543  | -26   | 5405       | -122    | 26729    | -117     | 79       | 31074 | 27   | 36    | 8        |
| 236 | HMG-236    | 8518  | 60269 | 6579             | 29400 | 290   | 8988  | -16   | 4103       | 109     | 22670    | 2        | 477      | 30807 | 61   | 43    | 18       |
| 237 | HMG-237    | 8855  | 60239 | 7395             | 21725 | 239   | 14008 | -3    | 789        | 295     | 34342    | 762      | 527      | 21903 | 37   | 23    | 20       |
| 238 | HMG-238    | 2601  | 6452  | 428              | 5732  | 51    | -119  | -112  | 158        | 92      | 326      | 132      | 97       | 1109  | 19   | 41    | 11       |
| 239 | HMG-239    | -23   | 240   | 221              | 250   | 8     | -103  | -49   | 18         | 24      | 1        | 21       | 13       | 26    | 31   | 27    | 6        |
| 240 | HMG-240    | -72   | 479   | 47               | -39   | 20    | -140  | -37   | 14         | 78      | 11       | 93       | -14      | -5    | 26   | 37    | 3        |
| 241 | HMG-241    | 4836  | 62213 | 5169             | 7168  | 274   | 1165  | 1     | 4188       | -80     | 54917    | 810      | 36       | 61281 | 19   | 24    | 9        |
| 242 | HMG-242    | 5400  | 62196 | 5738             | 10528 | 287   | 1285  | -49   | 12593      | -42     | 48761    | 654      | 113      | 63632 | 15   | 69    | 8        |
| 243 | HMG-243    | 10055 | 62582 | 6899             | 12569 | 167   | 5648  | -44   | 1400       | -132    | 60639    | 2587     | 404      | 48749 | 26   | 52    | 12       |
| 244 | HMG-244    | 12874 | 63818 | 7911             | 15440 | 295   | 4844  | 23    | 574        | -103    | 55948    | 28       | 297      | 53365 | 19   | 25    | 15       |
| 245 | HMG-245    | 556   | 31548 | 1465             | 1166  | 19    | -20   | -15   | 24         | 60      | 2929     | 162      | 22       | 56877 | 22   | 12    | 7        |
| 246 | HMG-246    | 728   | 40038 | 1963             | 4713  | 14    | 12687 | -121  | 31         | 48      | 4842     | 63       | 98       | 63972 | 25   | 35    | 18       |
| 247 | HMG-247    | 1500  | 48840 | 5476             | 4674  | 32    | 19286 | -151  | 44         | 72      | 9270     | 183      | 0        | 32612 | 28   | 16    | 11       |
| 248 | 3FL        | 30427 | 60745 | 73               | -54   | -2    | 543   | -50   | 16         | 34      | 2        | 144      | -26      | 64    | 10   | 82    | 11       |
| 249 | LNT        | -57   | -18   | 429              | 379   | 14    | -54   | -30   | 21323      | -23     | 48       | 45       | 19       | 30    | 30   | 64    | 10       |
| 250 | LNnT       | 14    | -41   | 8479             | 44293 | 13007 | -86   | -96   | 17         | -41     | 2        | 54       | 22       | 73    | 21   | -10   | 4        |
| 251 | LNFPi      | 1352  | 48854 | -2               | 43    | 12    | -92   | -102  | 3578       | 58834   | 8        | -166     | 16       | 40    | 28   | 20    | 3        |
| 252 | LNFPii     | 11846 | 59350 | 2                | 25    | 2     | -30   | 177   | 13         | -132    | 49738    | 2256     | 20       | 34    | 19   | 21    | 14       |
| 253 | LDFT       | 30334 | 61476 | -1               | 50    | 22    | 632   | 10747 | 14         | 40      | 1        | 107      | 38       | 37    | 23   | 42    | 5        |
| 254 | LNDfHI     | 9868  | 62747 | -16              | 465   | 37    | -106  | -114  | 41         | 76      | 7        | 61542    | 28       | 2021  | 21   | 92    | 14       |
| 255 | LSTa       | -79   | -15   | -60              | 19    | 8     | -189  | -119  | 17         | 65      | 165      | 63       | 129      | 55813 | 18   | 55    | 11       |
| 256 | LSTb       | -59   | -23   | 10               | -60   | 13    | 15    | -32   | 7          | 19      | 1        | 35       | 4        | 216   | 12   | 84    | 7        |
| 257 | LSTc       | -40   | 6     | 6100             | 3266  | 19    | 60474 | -54   | 26         | 21      | 2        | 47       | 16       | 40    | 19   | 120   | 8        |
| 258 | Sialyl Lea | 2816  | 28169 | -45              | 20    | 12    | -132  | -145  | 22         | -59     | 0        | 35       | 15       | 6960  | 9    | 38    | 7        |
| 259 | DSLNT      | -57   | -116  | -56              | 225   | 9     | -159  | -179  | 16         | -170    | 2        | -112     | 15       | 45085 | 23   | 177   | 22       |
| 260 | Biotin     | 2587  | 4783  | 1147             | 1565  | 845   | 1353  | 5913  | 9          | -20     | 15       | -7       | 8        | 20    | 21   | 64    | 3        |

Table S5. Rotavirus VP8\* binding HM-SGM-v2, showing data for Fig. 4 and Fig. 5 in tabular form.

| Chart ID | Sample ID | VP8*N155 |          |           |                 |                  | VP8*RV3 |          |           |                 |                  | VP8*B223 |          |                 |
|----------|-----------|----------|----------|-----------|-----------------|------------------|---------|----------|-----------|-----------------|------------------|----------|----------|-----------------|
|          |           | 2 µg/ml  | 20 µg/ml | 200 µg/ml | Neura 200 µg/ml | Fucase 200 µg/ml | 2 µg/ml | 20 µg/ml | 200 µg/ml | Neura 200 µg/ml | Fucase 200 µg/ml | 2 µg/ml  | 20 µg/ml | Neura 200 µg/ml |
| 1        | HMG-1     | 1        | 1        | 6         | 5               | 27               | 3       | 8        | 30        | 1               | 35               | 2        | 126      | 137             |
| 2        | HMG-2     | 2        | 1        | 6         | 7               | 31               | 3       | 6        | 30        | 3               | 47               | 2        | 228      | 197             |
| 3        | HMG-3     | 2        | 2        | 10        | 3               | 28               | 4       | 8        | 37        | 1               | 46               | 1        | 208      | 197             |
| 4        | HMG-4     | 1        | 3        | 3         | 1               | 20               | 1       | 2        | 6         | 1               | 22               | 1        | 11       | 30              |
| 5        | HMG-5     | 3        | 3        | 6         | 6               | 40               | 5473    | 7607     | 6145      | 6223            | 3755             | 2        | 211      | 176             |
| 6        | HMG-6     | 3        | 4        | 78        | 24              | 48               | 1       | 6        | 42        | 2               | 32               | 7        | 1301     | 592             |
| 7        | HMG-7     | 4        | 4        | 10        | 2               | 28               | 1       | 12       | 27        | 7               | 28               | 1        | 190      | 169             |
| 8        | HMG-8     | 2        | 2        | 5         | 6               | 24               | 6054    | 14962    | 7021      | 7627            | 3039             | 0        | 75       | 200             |
| 9        | HMG-9     | 2        | 2        | 8         | 4               | 26               | 1       | 19       | 52        | 6               | 32               | 3        | 230      | 190             |
| 10       | HMG-10    | 1        | 3        | 7         | 5               | 28               | 1       | 7        | 30        | 3               | 26               | 0        | 147      | 116             |
| 11       | HMG-11    | 1        | 1        | 3         | 2               | 21               | 1       | 5        | 10        | 0               | 23               | 0        | 10       | 35              |
| 12       | HMG-12    | 6        | 14       | 119       | 29              | 36               | 0       | 10       | 25        | 5               | 33               | 3        | 886      | 361             |
| 13       | HMG-13    | 14467    | 34539    | 23253     | 18320           | 19604            | 1       | 17       | 52        | 6               | 47               | 0        | 274      | 212             |
| 14       | HMG-14    | 15272    | 36807    | 23802     | 20683           | 20159            | 1       | 3        | 31        | 6               | 32               | 83       | 3797     | 4310            |
| 15       | HMG-15    | 2        | 17       | 143       | 15              | 39               | 1       | 4        | 12        | 2               | 25               | 1        | 581      | 288             |
| 16       | HMG-16    | 3        | 932      | 1770      | 395             | 32               | 1       | 13       | 24        | 2               | 28               | 123      | 4556     | 2927            |
| 17       | HMG-17    | 3        | 7        | 3         | 5               | 38               | 1       | 11       | 25        | 3               | 37               | 3        | 186      | 324             |
| 18       | HMG-18    | 14122    | 34452    | 23945     | 19153           | 21978            | 1       | 11       | 36        | 4               | 23               | 723      | 8899     | 3808            |
| 19       | HMG-19    | 10       | 18       | 5         | 4               | 22               | 2       | 13       | 22        | 2               | 30               | 1        | 269      | 209             |
| 20       | HMG-20    | 1        | 8        | 21        | 6               | 30               | 2       | 7        | 20        | 6               | 43               | 136      | 4437     | 1695            |
| 21       | HMG-21    | 17995    | 37753    | 23246     | 20287           | 20734            | 1       | 6        | 35        | 8               | 36               | 1        | 490      | 237             |
| 22       | HMG-22    | 1        | 5        | 14        | 1               | 27               | 7       | 11       | 11        | 3               | 26               | 1        | 320      | 200             |
| 23       | HMG-23    | 2        | 1111     | 1846      | 675             | 73               | 5       | 18       | 41        | 3               | 32               | 1036     | 9331     | 5420            |
| 24       | HMG-24    | 1        | 4        | 7         | 2               | 22               | 2       | 10       | 15        | 5               | 20               | 0        | 132      | 111             |
| 25       | HMG-25    | 3        | 6        | 4         | 5               | 23               | 2       | 9        | 29        | 2               | 33               | 1        | 202      | 159             |
| 26       | HMG-26    | 3        | 4        | 4         | 4               | 22               | 1       | 3        | 38        | 1               | 29               | 6        | 220      | 170             |
| 27       | HMG-27    | 20448    | 38111    | 25558     | 22416           | 22573            | 1       | 10       | 58        | 3               | 41               | 1        | 205      | 164             |
| 28       | HMG-28    | 20041    | 38029    | 24451     | 21410           | 22235            | 4       | 17       | 46        | 6               | 44               | 2        | 363      | 265             |
| 29       | HMG-29    | 4        | 2896     | 10846     | 8017            | 21518            | 2       | 21       | 98        | 7               | 53               | 1        | 249      | 208             |
| 30       | HMG-30    | 1        | 3        | 12        | 3               | 32               | 1       | 6        | 29        | 5               | 32               | 1        | 392      | 247             |
| 31       | HMG-31    | 2        | 18       | 79        | 16              | 56               | 1       | 28       | 40        | 6               | 31               | 297      | 4612     | 2823            |
| 32       | HMG-32    | 0        | 3        | 4         | 2               | 21               | 2       | 18       | 32        | 6               | 25               | 1        | 132      | 155             |
| 33       | HMG-33    | 14119    | 34297    | 22308     | 18681           | 20033            | 22      | 600      | 157       | 47              | 113              | 1        | 224      | 158             |
| 34       | HMG-34    | 4        | 10       | 26        | 9               | 22442            | 1       | 19       | 27        | 5               | 34               | 3        | 289      | 256             |
| 35       | HMG-35    | 6        | 16       | 51        | 19              | 74               | 1       | 14       | 36        | 3               | 42               | 4        | 768      | 403             |
| 36       | HMG-36    | 1        | 1        | 6         | 2               | 25               | 1       | 14       | 23        | 5               | 29               | 1        | 149      | 179             |
| 37       | HMG-37    | 3        | 3        | 4         | 6               | 29               | 6969    | 22565    | 6102      | 8453            | 8419             | 1        | 215      | 215             |
| 38       | HMG-38    | 0        | 2        | 19        | 6               | 73               | 2       | 33       | 50        | 9               | 33               | 1        | 106      | 175             |
| 39       | HMG-39    | 3        | 1        | 4         | 4               | 27               | 2       | 7        | 21        | 3               | 21               | 1        | 68       | 154             |
| 40       | HMG-40    | 2        | 3        | 3         | 2               | 19               | 3       | 10       | 41        | 2               | 24               | 1        | 138      | 1484            |
| 41       | HMG-41    | 1        | 1        | 7         | 6               | 25               | 12902   | 28255    | 8581      | 11341           | 13335            | 2        | 213      | 209             |
| 42       | HMG-42    | 2        | 3        | 5         | 3               | 21               | 3       | 3        | 18        | 4               | 32               | 2        | 113      | 155             |
| 43       | HMG-43    | 2        | 2        | 5         | 2               | 34               | 1       | 7        | 27        | 2               | 49               | 1        | 209      | 229             |
| 44       | HMG-44    | 1        | 2        | 14        | 4               | 32               | 3       | 8        | 40        | 4               | 29               | 1        | 228      | 220             |
| 45       | HMG-45    | 1490     | 13574    | 16712     | 15573           | 10427            | 1       | 4        | 23        | 4               | 35               | 169      | 6326     | 4474            |
| 46       | HMG-46    | 1        | 1        | 8         | 6               | 144              | 2       | 3        | 76        | 4               | 28               | 0        | 228      | 1682            |
| 47       | HMG-47    | 75       | 9116     | 18201     | 12666           | 2478             | 1       | 5        | 23        | 8               | 25               | 2548     | 11069    | 8714            |
| 48       | HMG-48    | 0        | 4        | 14        | 6               | 24               | 3529    | 11742    | 1452      | 3083            | 509              | 2        | 769      | 350             |
| 49       | HMG-49    | 2        | 6        | 9         | 4               | 36               | 15746   | 34431    | 9088      | 11933           | 12756            | 2        | 346      | 228             |
| 50       | HMG-50    | 3        | 35       | 155       | 36              | 1312             | 0       | 16       | 33        | 3               | 42               | 2        | 552      | 586             |
| 51       | HMG-51    | 31       | 2764     | 6564      | 4330            | 15432            | 1       | 38       | 51        | 20              | 45               | 5        | 434      | 310             |
| 52       | HMG-52    | 32       | 2251     | 2871      | 2867            | 649              | 1       | 9        | 27        | 3               | 24               | 5        | 1035     | 437             |
| 53       | HMG-53    | 1        | 2        | 6         | 10              | 40               | 1       | 13       | 34        | 1               | 30               | 2        | 741      | 361             |
| 54       | HMG-54    | 1        | 345      | 504       | 157             | 59               | 2       | 7        | 45        | 7               | 31               | 1133     | 8109     | 7351            |
| 55       | HMG-55    | 1        | 3        | 3         | 3               | 26               | 13731   | 32440    | 8167      | 11916           | 12672            | 2        | 260      | 532             |
| 56       | HMG-56    | 3        | 1        | 2         | 4               | 7278             | 11058   | 26373    | 6957      | 9269            | 10969            | 1        | 146      | 106             |
| 57       | HMG-57    | 1        | 5        | 9         | 8               | 37               | 3       | 5        | 18        | 3               | 20               | 0        | 312      | 228             |
| 58       | HMG-58    | 3        | 5        | 3         | 3               | 22               | 1       | 9        | 22        | 3               | 33               | 1        | 147      | 128             |
| 59       | HMG-59    | 1        | 2        | 23        | 3               | 26               | 4       | 6        | 23        | 4               | 33               | 6        | 147      | 152             |
| 60       | HMG-60    | 1        | 25       | 216       | 94              | 18122            | 2       | 52       | 122       | 20              | 49               | 1        | 228      | 205             |
| 61       | HMG-61    | 3        | 1        | 3         | 4               | 40               | 4       | 7        | 19        | 5               | 32               | 1        | 156      | 140             |
| 62       | HMG-62    | 1        | 17       | 27        | 5               | 16424            | 8056    | 23227    | 6847      | 10232           | 10020            | 0        | 101      | 238             |
| 63       | HMG-63    | 1        | 7        | 23        | 4               | 35               | 4       | 12       | 26        | 2               | 27               | 1        | 110      | 152             |
| 64       | HMG-64    | 3        | 5        | 54        | 9               | 25               | 2       | 10       | 19        | 3               | 22               | 1        | 482      | 293             |

| Chart ID | Sample ID | VP8*N155 |          |           |                 |                  | VP8*RV3 |          |           |                 |                  | VP8*B223 |          |                 |
|----------|-----------|----------|----------|-----------|-----------------|------------------|---------|----------|-----------|-----------------|------------------|----------|----------|-----------------|
|          |           | 2 µg/ml  | 20 µg/ml | 200 µg/ml | Neura 200 µg/ml | Fucase 200 µg/ml | 2 µg/ml | 20 µg/ml | 200 µg/ml | Neura 200 µg/ml | Fucase 200 µg/ml | 2 µg/ml  | 20 µg/ml | Neura 200 µg/ml |
| 65       | HMG-65    | 926      | 7756     | 17342     | 12921           | 9922             | 6       | 8        | 43        | 4               | 32               | 27       | 2227     | 1928            |
| 66       | HMG-66    | 4        | 1915     | 12142     | 7106            | 2774             | 1       | 37       | 96        | 9               | 45               | 896      | 9953     | 6712            |
| 67       | HMG-67    | 3        | 1781     | 7639      | 4686            | 5298             | 1       | 5        | 46        | 5               | 37               | 6        | 1178     | 672             |
| 68       | HMG-68    | 1        | 4        | 7         | 3               | 22               | 0       | 5        | 25        | 4               | 32               | 1        | 111      | 136             |
| 69       | HMG-69    | 2        | 1        | 3         | 4               | 28               | 6381    | 18976    | 6176      | 10183           | 10451            | 1        | 278      | 215             |
| 70       | HMG-70    | 2        | 1        | 9         | 9               | 28               | 3       | 4        | 21        | 3               | 26               | 1        | 152      | 159             |
| 71       | HMG-71    | 1        | 2        | 24        | 7               | 29               | 1       | 6        | 13        | 4               | 29               | 1        | 84       | 119             |
| 72       | HMG-72    | 1        | 3        | 3         | 3               | 20               | 4       | 27       | 47        | 8               | 27               | 1        | 116      | 65              |
| 73       | HMG-73    | 2        | 3        | 11        | 2               | 48               | 0       | 6        | 18        | 5               | 32               | 2        | 618      | 263             |
| 74       | HMG-74    | 1        | 2        | 36        | 16              | 35               | 11      | 5        | 29        | 2               | 30               | 2        | 517      | 259             |
| 75       | HMG-75    | 1        | 5        | 26        | 17              | 38               | 0       | 11       | 30        | 1               | 34               | 0        | 184      | 150             |
| 76       | HMG-76    | 1        | 3        | 14        | 3               | 36               | 14392   | 33234    | 8505      | 12823           | 13170            | 2        | 785      | 345             |
| 77       | HMG-77    | 1        | 23       | 219       | 35              | 76               | 2       | 8        | 34        | 4               | 35               | 3        | 606      | 305             |
| 78       | HMG-78    | 2        | 21       | 330       | 83              | 81               | 2       | 3        | 35        | 2               | 30               | 0        | 218      | 234             |
| 79       | HMG-79    | 3        | 2        | 16        | 5               | 26               | 5       | 16       | 30        | 2               | 29               | 1        | 300      | 251             |
| 80       | HMG-80    | 1        | 4        | 46        | 7               | 95               | 1       | 5        | 22        | 5               | 22               | 1        | 331      | 257             |
| 81       | HMG-81    | 2        | 36       | 518       | 108             | 106              | 1       | 7        | 30        | 3               | 44               | 2        | 263      | 274             |
| 82       | HMG-82    | 3        | 7        | 8         | 4               | 24               | 3       | 10       | 51        | 12              | 26               | 2        | 225      | 2330            |
| 83       | HMG-83    | 4        | 2        | 4         | 2               | 22               | 1       | 47       | 162       | 87              | 67               | 1        | 91       | 560             |
| 84       | HMG-84    | 0        | 3        | 6         | 8               | 92               | 1       | 6        | 45        | 5               | 33               | 1        | 194      | 1127            |
| 85       | HMG-85    | 6        | 181      | 229       | 112             | 93               | 1       | 6        | 26        | 2               | 28               | 1        | 527      | 301             |
| 86       | HMG-86    | 4        | 10       | 6         | 3               | 20               | 2       | 9        | 26        | 1               | 32               | 1        | 124      | 171             |
| 87       | HMG-87    | 1        | 5        | 5         | 1               | 17               | 4       | 9        | 18        | 2               | 26               | 3        | 81       | 1953            |
| 88       | HMG-88    | 3        | 4        | 9         | 14              | 32               | 2       | 12       | 22        | 16              | 27               | 2        | 198      | 247             |
| 89       | HMG-89    | 1732     | 15530    | 19223     | 16303           | 20604            | 4159    | 17298    | 3738      | 9199            | 4395             | 2        | 1331     | 488             |
| 90       | HMG-90    | 795      | 8292     | 16919     | 13545           | 15293            | 5       | 82       | 331       | 158             | 106              | 8        | 575      | 432             |
| 91       | HMG-91    | 928      | 8047     | 16641     | 10388           | 14778            | 1       | 30       | 249       | 100             | 88               | 3        | 310      | 293             |
| 92       | HMG-92    | 897      | 8175     | 16186     | 13136           | 13017            | 1       | 53       | 220       | 70              | 60               | 1        | 386      | 286             |
| 93       | HMG-93    | 103      | 3924     | 9900      | 11147           | 7281             | 2       | 14       | 113       | 24              | 48               | 1        | 240      | 254             |
| 94       | HMG-94    | 97       | 4503     | 8978      | 11053           | 3931             | 3       | 17       | 145       | 33              | 36               | 3        | 265      | 308             |
| 95       | HMG-95    | 25       | 2786     | 6742      | 9406            | 711              | 2       | 33       | 161       | 55              | 45               | 1        | 170      | 291             |
| 96       | HMG-96    | 4        | 333      | 1795      | 4705            | 195              | 3       | 17       | 106       | 20              | 31               | 3        | 188      | 456             |
| 97       | HMG-97    | 1        | 12       | 3         | 11              | 25               | 1       | 2        | 23        | 3               | 28               | 1        | 177      | 379             |
| 98       | HMG-98    | 3        | 2        | 9         | 340             | 28               | 3       | 7        | 31        | 1               | 27               | 1        | 560      | 4153            |
| 99       | HMG-99    | 1        | 3        | 4         | 2               | 20               | 1       | 7        | 20        | 3               | 29               | 1        | 80       | 168             |
| 100      | HMG-100   | 2        | 3        | 3         | 7               | 22               | 0       | 2        | 26        | 5               | 30               | 1        | 173      | 266             |
| 101      | HMG-101   | 1        | 2        | 7         | 4               | 18               | 2       | 6        | 12        | 3               | 30               | 2        | 104      | 1696            |
| 102      | HMG-102   | 2        | 4        | 4         | 4               | 19               | 0       | 2        | 16        | 4               | 33               | 1        | 84       | 293             |
| 103      | HMG-103   | 2        | 3        | 14        | 7               | 22               | 1       | 2        | 21        | 1               | 23               | 1        | 126      | 1626            |
| 104      | HMG-104   | 4        | 16       | 5         | 2               | 27               | 1       | 6        | 16        | 6876            | 28               | 1        | 138      | 200             |
| 105      | HMG-105   | 2        | 3        | 10        | 12              | 34               | 144     | 562      | 1279      | 7806            | 134              | 2        | 174      | 223             |
| 106      | HMG-106   | 2        | 2        | 2         | 8               | 22               | 1       | 2        | 4         | 2               | 21               | 1        | 13       | 2508            |
| 107      | HMG-107   | 1        | 1        | 7         | 5               | 25               | 1       | 10       | 29        | 7               | 38               | 2        | 220      | 192             |
| 108      | HMG-108   | 1        | 2        | 12        | 6               | 31               | 848     | 1525     | 3296      | 10416           | 810              | 2        | 188      | 253             |
| 109      | HMG-109   | 2        | 2        | 2         | 2               | 25               | 1       | 4        | 18        | 2               | 24               | 1        | 14       | 70              |
| 110      | HMG-110   | 2        | 5        | 6         | 2               | 28               | 2       | 11       | 31        | 10729           | 45               | 2        | 130      | 230             |
| 111      | HMG-111   | 5        | 1        | 4         | 4               | 28               | 3       | 9        | 26        | 10177           | 36               | 1        | 138      | 272             |
| 112      | HMG-112   | 1        | 2        | 6         | 4               | 25               | 1       | 12       | 24        | 3               | 31               | 1        | 184      | 256             |
| 113      | HMG-113   | 2        | 11       | 9         | 50              | 33               | 1       | 2        | 27        | 4               | 37               | 2        | 228      | 1302            |
| 114      | HMG-114   | 8        | 13       | 5         | 7               | 34               | 0       | 10       | 26        | 3               | 30               | 1        | 231      | 1062            |
| 115      | HMG-115   | 1        | 5        | 4         | 11821           | 17               | 2       | 8        | 20        | 2               | 25               | 1        | 191      | 4075            |
| 116      | HMG-116   | 1        | 1        | 1         | 1               | 15               | 1       | 2        | 3         | 1               | 25               | 1        | 192      | 6               |
| 117      | HMG-117   | 1        | 2        | 10        | 5               | 47               | 4       | 5        | 36        | 3               | 46               | 1        | 181      | 247             |
| 118      | HMG-118   | 7        | 10       | 5         | 8               | 27               | 1       | 8        | 36        | 1               | 25               | 1        | 249      | 276             |
| 119      | HMG-119   | 1        | 4        | 3         | 7               | 30               | 2       | 3        | 36        | 4               | 36               | 1        | 87       | 255             |
| 120      | HMG-120   | 6        | 2        | 7         | 25022           | 27               | 3       | 2        | 25        | 6               | 33               | 3        | 149      | 251             |
| 121      | HMG-121   | 2        | 7        | 39        | 82              | 31               | 1       | 2        | 18        | 5               | 33               | 1        | 555      | 375             |
| 122      | HMG-122   | 3        | 3        | 5         | 3               | 20               | 9       | 10       | 17        | 4               | 41               | 5        | 286      | 249             |
| 123      | HMG-123   | 1        | 2        | 3         | 14              | 21               | 3       | 4        | 21        | 6               | 29               | 1        | 235      | 408             |
| 124      | HMG-124   | 1        | 5        | 2         | 4               | 15               | 3       | 1963     | 8         | 1               | 15               | 0        | 7        | 87              |
| 125      | HMG-125   | 1        | 6        | 36        | 6418            | 34               | 1       | 4        | 19        | 3               | 22               | 5        | 1680     | 2615            |
| 126      | HMG-126   | 4        | 2        | 7         | 4               | 29               | 2       | 4        | 29        | 5               | 32               | 31       | 117      | 204             |
| 127      | HMG-127   | 3        | 11       | 11        | 2308            | 20               | 1       | 4        | 24        | 3               | 26               | 2        | 475      | 3567            |
| 128      | HMG-128   | 3        | 9        | 5         | 3               | 15               | 1       | 6        | 15        | 3               | 25               | 0        | 101      | 173             |
| 129      | HMG-129   | 2        | 2        | 3         | 2               | 28               | 1       | 28       | 67        | 15              | 51               | 1        | 206      | 227             |
| 130      | HMG-130   | 4        | 2        | 6         | 6               | 20               | 1       | 4        | 16        | 4               | 31               | 1        | 235      | 266             |
| 131      | HMG-131   | 0        | 3        | 3         | 2               | 24               | 2       | 8        | 18        | 3               | 25               | 0        | 226      | 238             |
| 132      | HMG-132   | 1        | 1        | 6         | 6               | 31               | 2       | 12       | 26        | 1               | 29               | 2        | 195      | 1883            |

| Chart ID | Sample ID | VP8*N155 |          |           |                 |                  | VP8*RV3 |          |           |                 |                  | VP8*B223 |          |                 |
|----------|-----------|----------|----------|-----------|-----------------|------------------|---------|----------|-----------|-----------------|------------------|----------|----------|-----------------|
|          |           | 2 µg/ml  | 20 µg/ml | 200 µg/ml | Neura 200 µg/ml | Fucase 200 µg/ml | 2 µg/ml | 20 µg/ml | 200 µg/ml | Neura 200 µg/ml | Fucase 200 µg/ml | 2 µg/ml  | 20 µg/ml | Neura 200 µg/ml |
| 133      | HMG-133   | 2        | 2        | 2         | 2               | 20               | 1       | 4        | 6         | 2               | 21               | 1        | 12       | 2660            |
| 134      | HMG-134   | 1        | 1        | 5         | 7               | 32               | 1       | 6        | 26        | 3               | 40               | 1        | 188      | 1050            |
| 135      | HMG-135   | 1        | 2        | 6         | 2               | 20               | 3       | 8        | 52        | 2               | 33               | 1        | 95       | 253             |
| 136      | HMG-136   | 1        | 1        | 6         | 2               | 21               | 2       | 5        | 17        | 3               | 19               | 1        | 79       | 311             |
| 137      | HMG-137   | 2        | 2        | 3         | 2               | 38               | 13      | 31       | 11        | 33              | 31               | 0        | 170      | 302             |
| 138      | HMG-138   | 1        | 5        | 16        | 9               | 22               | 2       | 39       | 104       | 259             | 59               | 1        | 231      | 284             |
| 139      | HMG-139   | 1        | 2        | 7         | 2179            | 29               | 1       | 6        | 26        | 3               | 28               | 9        | 281      | 4554            |
| 140      | HMG-140   | 3        | 1        | 2         | 12              | 21               | 2       | 7        | 20        | 2               | 41               | 0        | 200      | 2225            |
| 141      | HMG-141   | 3        | 6        | 11        | 73              | 26               | 2       | 5        | 19        | 2               | 28               | 1        | 561      | 2862            |
| 142      | HMG-142   | 3        | 3        | 5         | 5               | 27               | 14244   | 33184    | 8299      | 14063           | 14913            | 2        | 254      | 253             |
| 143      | HMG-143   | 3        | 2        | 5         | 12              | 32               | 2       | 7        | 28        | 3               | 28               | 1        | 139      | 4356            |
| 144      | HMG-144   | 3        | 5        | 2         | 7               | 24               | 3       | 7        | 21        | 6               | 22               | 0        | 83       | 165             |
| 145      | HMG-145   | 4        | 9        | 7         | 3               | 22               | 3       | 3        | 13        | 4               | 26               | 1        | 68       | 214             |
| 146      | HMG-146   | 1        | 9        | 8         | 60              | 22               | 18      | 3        | 23        | 3               | 30               | 0        | 190      | 4893            |
| 147      | HMG-147   | 2        | 2        | 9         | 2               | 24               | 1       | 5        | 29        | 7               | 27               | 0        | 145      | 171             |
| 148      | HMG-148   | 0        | 2        | 5         | 10              | 29               | 13005   | 32801    | 7100      | 11627           | 13168            | 1        | 347      | 2919            |
| 149      | HMG-149   | 2        | 1        | 9         | 13              | 24               | 1       | 3        | 16        | 4               | 30               | 1        | 127      | 3765            |
| 150      | HMG-150   | 4        | 6        | 6         | 9               | 22               | 2       | 4        | 20        | 2               | 30               | 1        | 137      | 1169            |
| 151      | HMG-151   | 1        | 1        | 4         | 18              | 23               | 3       | 3        | 22        | 4               | 29               | 1        | 100      | 400             |
| 152      | HMG-152   | 1        | 6        | 19        | 32              | 63               | 1620    | 7348     | 1119      | 3877            | 1178             | 4        | 751      | 4764            |
| 153      | HMG-153   | 1        | 5        | 8         | 4               | 27               | 1       | 10       | 42        | 9058            | 29               | 1        | 225      | 274             |
| 154      | HMG-154   | 1        | 6        | 8         | 62              | 25               | 8951    | 26858    | 7018      | 13122           | 13172            | 1        | 317      | 262             |
| 155      | HMG-155   | 1        | 3        | 7         | 5               | 28               | 2       | 47       | 102       | 12022           | 63               | 1        | 282      | 230             |
| 156      | HMG-156   | 1        | 8        | 3         | 7               | 26               | 3       | 12       | 40        | 11              | 32               | 1        | 174      | 187             |
| 157      | HMG-157   | 3        | 7        | 6         | 5               | 78               | 1       | 7        | 19        | 9               | 33               | 0        | 151      | 149             |
| 158      | HMG-158   | 1        | 2        | 11        | 5               | 28               | 2       | 14       | 101       | 8424            | 44               | 1        | 195      | 266             |
| 159      | HMG-159   | 4        | 2        | 7         | 5               | 35               | 109     | 825      | 1637      | 8042            | 168              | 1        | 191      | 303             |
| 160      | HMG-160   | 2        | 6        | 4         | 6               | 22               | 2       | 8        | 14        | 13866           | 26               | 1        | 25       | 113             |
| 161      | HMG-161   | 4        | 9        | 8         | 3               | 22               | 3       | 3        | 31        | 1               | 35               | 3        | 109      | 169             |
| 162      | HMG-162   | 2        | 4        | 4         | 25              | 21               | 1       | 5        | 17        | 4               | 22               | 1        | 241      | 4706            |
| 163      | HMG-163   | 1        | 2        | 6         | 1490            | 29               | 1       | 5        | 46        | 6               | 37               | 1        | 262      | 6096            |
| 164      | HMG-164   | 1        | 6        | 5         | 1               | 33               | 10134   | 28246    | 6842      | 12873           | 10940            | 1        | 299      | 254             |
| 165      | HMG-165   | 2        | 4        | 11        | 35              | 42               | 4       | 7        | 38        | 8               | 35               | 82       | 4757     | 4990            |
| 166      | HMG-166   | 3        | 1        | 4         | 7               | 25               | 591     | 2227     | 530       | 4240            | 173              | 1        | 161      | 308             |
| 167      | HMG-167   | 1        | 2        | 6         | 6               | 24               | 2       | 4        | 33        | 12204           | 31               | 1        | 93       | 176             |
| 168      | HMG-168   | 8        | 41       | 4         | 3               | 23               | 15694   | 33334    | 8770      | 12542           | 15343            | 1        | 127      | 240             |
| 169      | HMG-169   | 2        | 7        | 3         | 7               | 24               | 9573    | 27514    | 6525      | 13580           | 11419            | 1        | 200      | 1028            |
| 170      | HMG-170   | 1        | 3        | 4         | 8               | 18               | 1       | 2        | 12        | 3               | 22               | 2        | 42       | 4323            |
| 171      | HMG-171   | 4        | 6        | 12        | 43              | 34               | 3       | 2        | 18        | 6               | 28               | 1        | 537      | 4176            |
| 172      | HMG-172   | 2        | 1        | 5         | 3               | 32               | 2       | 4        | 21        | 8               | 37               | 1        | 161      | 182             |
| 173      | HMG-173   | 3        | 5        | 7         | 5               | 35               | 1       | 5        | 17        | 9               | 37               | 1        | 264      | 243             |
| 174      | HMG-174   | 7        | 2        | 6         | 7               | 30               | 2       | 4        | 27        | 6               | 29               | 2        | 72       | 170             |
| 175      | HMG-175   | 3        | 3        | 4         | 8               | 20               | 2       | 5        | 22        | 7               | 25               | 1        | 205      | 2550            |
| 176      | HMG-176   | 3        | 3        | 5         | 6               | 18               | 2       | 7        | 16        | 5               | 26               | 1        | 132      | 184             |
| 177      | HMG-177   | 3        | 7        | 5         | 4               | 26               | 6       | 10       | 15        | 6               | 27               | 1        | 86       | 216             |
| 178      | HMG-178   | 2        | 2        | 6         | 737             | 19               | 2       | 5        | 15        | 3               | 21               | 1        | 162      | 326             |
| 179      | HMG-179   | 2        | 6        | 3         | 16              | 22               | 1       | 7        | 14        | 8               | 27               | 1        | 217      | 4234            |
| 180      | HMG-180   | 3        | 3        | 13        | 11              | 25               | 2       | 5        | 13        | 3               | 26               | 1        | 444      | 408             |
| 181      | HMG-181   | 7        | 14       | 4         | 3               | 37               | 8335    | 25100    | 5177      | 9159            | 8565             | 0        | 221      | 1306            |
| 182      | HMG-182   | 12       | 12       | 5         | 8               | 21               | 2       | 10       | 18        | 3               | 26               | 1        | 143      | 198             |
| 183      | HMG-183   | 1        | 1        | 7         | 11              | 25               | 2       | 2        | 16        | 10              | 28               | 3        | 102      | 359             |
| 184      | HMG-184   | 3        | 2        | 3         | 4               | 20               | 2       | 8        | 26        | 11084           | 23               | 2        | 84       | 162             |
| 185      | HMG-185   | 4        | 10       | 8         | 5               | 26               | 2       | 6        | 34        | 6               | 37               | 6        | 84       | 324             |
| 186      | HMG-186   | 1        | 8        | 5         | 7               | 21               | 1       | 5        | 29        | 10              | 27               | 2        | 175      | 231             |
| 187      | HMG-187   | 1        | 3        | 2         | 3               | 21               | 3       | 10       | 18        | 2               | 62               | 3        | 181      | 337             |
| 188      | HMG-188   | 6        | 3        | 4         | 15              | 25               | 2       | 2        | 16        | 5               | 30               | 2        | 144      | 4100            |
| 189      | HMG-189   | 4        | 6        | 5         | 10              | 23               | 2       | 6        | 18        | 18              | 24               | 3        | 61       | 248             |
| 190      | HMG-190   | 3        | 2        | 5         | 689             | 20               | 1       | 3        | 19        | 18              | 27               | 1        | 170      | 9275            |
| 191      | HMG-191   | 2        | 13       | 6         | 5               | 26               | 1       | 4        | 17        | 8               | 26               | 1        | 105      | 3996            |
| 192      | HMG-192   | 1        | 2        | 6         | 48              | 29               | 3       | 4        | 9         | 2               | 29               | 1        | 34       | 128             |
| 193      | HMG-193   | 1        | 2        | 10        | 10              | 25               | 3       | 6        | 21        | 3               | 19               | 0        | 186      | 4039            |
| 194      | HMG-194   | 3        | 5        | 11        | 79              | 21               | 2       | 2        | 21        | 5               | 19               | 0        | 197      | 3690            |
| 195      | HMG-195   | 4        | 4        | 33        | 15              | 41               | 1       | 5        | 16        | 3               | 22               | 2        | 546      | 381             |
| 196      | HMG-196   | 1        | 3        | 9         | 13              | 28               | 1       | 3        | 25        | 4               | 28               | 3        | 143      | 6278            |
| 197      | HMG-197   | 0        | 3        | 6         | 8761            | 58               | 3       | 59       | 196       | 118             | 85               | 1        | 233      | 1505            |
| 198      | HMG-198   | 4        | 3        | 15        | 5               | 16               | 2       | 12       | 21        | 11              | 32               | 1        | 181      | 348             |
| 199      | HMG-199   | 1        | 3        | 10        | 3               | 33               | 1       | 5        | 35        | 9               | 29               | 1        | 199      | 322             |
| 200      | HMG-200   | 1        | 1        | 2         | 8               | 19               | 2       | 4        | 17        | 10              | 25               | 3        | 97       | 178             |

| Chart ID | Sample ID  | VP8*N155 |          |           |                 |                  | VP8*RV3 |          |           |                 |                  | VP8*B223 |          |                 |
|----------|------------|----------|----------|-----------|-----------------|------------------|---------|----------|-----------|-----------------|------------------|----------|----------|-----------------|
|          |            | 2 µg/ml  | 20 µg/ml | 200 µg/ml | Neura 200 µg/ml | Fucase 200 µg/ml | 2 µg/ml | 20 µg/ml | 200 µg/ml | Neura 200 µg/ml | Fucase 200 µg/ml | 2 µg/ml  | 20 µg/ml | Neura 200 µg/ml |
| 201      | HMG-201    | 2        | 2        | 8         | 2               | 26               | 6       | 4        | 23        | 6               | 30               | 2        | 82       | 154             |
| 202      | HMG-202    | 1        | 1        | 3         | 7               | 35               | 2       | 22       | 13        | 4               | 23               | 1        | 177      | 1792            |
| 203      | HMG-203    | 1        | 6        | 12        | 53              | 34               | 0       | 2        | 15        | 6               | 32               | 2        | 496      | 3440            |
| 204      | HMG-204    | 4        | 2        | 6         | 3               | 23               | 1       | 4        | 21        | 3               | 29               | 1        | 106      | 1016            |
| 205      | HMG-205    | 1        | 2        | 6         | 5               | 19               | 0       | 3        | 24        | 15              | 29               | 1        | 163      | 1110            |
| 206      | HMG-206    | 3        | 3        | 9         | 2               | 27               | 1       | 7        | 29        | 5               | 33               | 1        | 189      | 239             |
| 207      | HMG-207    | 2        | 4        | 5         | 10              | 20               | 1       | 4        | 15        | 7               | 32               | 0        | 107      | 789             |
| 208      | HMG-208    | 3        | 4        | 7         | 3               | 42               | 1       | 2        | 30        | 7771            | 23               | 1        | 135      | 368             |
| 209      | HMG-209    | 2        | 5        | 6         | 5               | 22               | 1       | 6        | 23        | 5               | 33               | 1        | 133      | 199             |
| 210      | HMG-210    | 4        | 12       | 11        | 9               | 32               | 0       | 6        | 28        | 4               | 35               | 1        | 197      | 315             |
| 211      | HMG-211    | 1        | 4        | 7         | 19881           | 22               | 1       | 8        | 30        | 12              | 36               | 3        | 222      | 357             |
| 212      | HMG-212    | 1        | 27       | 3         | 3               | 25               | 2       | 15       | 37        | 4               | 22               | 3        | 159      | 275             |
| 213      | HMG-213    | 2        | 3        | 3         | 3               | 25               | 1       | 4        | 15        | 9656            | 28               | 2        | 59       | 185             |
| 214      | HMG-214    | 3        | 3        | 4         | 4               | 25               | 1       | 4        | 29        | 13              | 27               | 2        | 102      | 214             |
| 215      | HMG-215    | 1        | 1        | 9         | 4               | 20               | 1       | 7        | 54        | 454             | 36               | 0        | 65       | 224             |
| 216      | HMG-216    | 1        | 4        | 2         | 3               | 20               | 1       | 4        | 21        | 1               | 23               | 1        | 80       | 210             |
| 217      | HMG-217    | 0        | 4        | 5         | 2937            | 23               | 2       | 3        | 27        | 5               | 31               | 1        | 99       | 400             |
| 218      | HMG-218    | 3        | 1        | 4         | 2               | 23               | 9       | 23       | 33        | 7               | 29               | 1        | 169      | 232             |
| 219      | HMG-219    | 2        | 2        | 6         | 8               | 22               | 3       | 8        | 20        | 15              | 29               | 1        | 174      | 285             |
| 220      | HMG-220    | 2        | 2        | 7         | 2               | 30               | 1       | 15       | 60        | 23              | 41               | 2        | 168      | 271             |
| 221      | HMG-221    | 2        | 3        | 8         | 24              | 28               | 36      | 668      | 351       | 6937            | 147              | 0        | 240      | 285             |
| 222      | HMG-222    | 1        | 4        | 4         | 1198            | 25               | 2       | 9        | 23        | 12              | 25               | 2        | 155      | 3101            |
| 223      | HMG-223    | 2        | 2        | 3         | 5               | 24               | 1       | 5        | 29        | 3               | 24               | 0        | 72       | 238             |
| 224      | HMG-224    | 3        | 8        | 16        | 18930           | 25               | 3       | 7        | 23        | 21              | 25               | 1        | 124      | 251             |
| 225      | HMG-225    | 4        | 2        | 29        | 16              | 35               | 2       | 3        | 20        | 4               | 33               | 1        | 391      | 453             |
| 226      | HMG-226    | 2        | 1        | 8         | 3               | 22               | 2       | 19       | 23        | 11515           | 21               | 2        | 184      | 240             |
| 227      | HMG-227    | 2        | 1        | 4         | 8               | 27               | 1       | 10       | 28        | 12209           | 27               | 2        | 166      | 271             |
| 228      | HMG-228    | 2        | 2        | 6         | 3               | 23               | 1       | 8        | 31        | 5               | 26               | 1        | 175      | 211             |
| 229      | HMG-229    | 4        | 1        | 3         | 2992            | 27               | 1       | 2        | 17        | 8               | 27               | 1        | 126      | 5253            |
| 230      | HMG-230    | 1        | 2        | 8         | 3               | 27               | 2       | 22       | 55        | 11859           | 35               | 0        | 130      | 248             |
| 231      | HMG-231    | 2        | 4        | 36        | 26              | 31               | 2       | 8        | 36        | 5               | 30               | 2        | 308      | 401             |
| 232      | HMG-232    | 3        | 3        | 10        | 4               | 21               | 1       | 1        | 29        | 11214           | 22               | 1        | 64       | 133             |
| 233      | HMG-233    | 0        | 2        | 5         | 2               | 15               | 2       | 4        | 21        | 4               | 25               | 0        | 120      | 163             |
| 234      | HMG-234    | 1        | 6        | 3         | 5               | 24               | 6308    | 21608    | 5913      | 13777           | 11545            | 1        | 175      | 241             |
| 235      | HMG-235    | 3        | 725      | 3959      | 8293            | 277              | 6       | 93       | 278       | 159             | 64               | 2        | 228      | 441             |
| 236      | HMG-236    | 4        | 79       | 328       | 2054            | 78               | 3       | 53       | 118       | 41              | 63               | 2        | 245      | 468             |
| 237      | HMG-237    | 3        | 42       | 174       | 1222            | 77               | 1       | 31       | 97        | 7               | 47               | 0        | 223      | 455             |
| 238      | HMG-238    | 1        | 15       | 11        | 10              | 20               | 4       | 11       | 16        | 1130            | 34               | 1        | 63       | 97              |
| 239      | HMG-239    | 4        | 18       | 5         | 1               | 17               | 2       | 3        | 6         | 0               | 20               | 0        | 3        | 14              |
| 240      | HMG-240    | 1        | 3        | 8         | 17              | 20               | 1       | 5        | 31        | 3               | 19               | 0        | 18       | 132             |
| 241      | HMG-241    | 5        | 430      | 3543      | 10577           | 1592             | 3       | 30       | 104       | 365             | 49               | 2        | 192      | 359             |
| 242      | HMG-242    | 1        | 149      | 1230      | 12849           | 264              | 3       | 54       | 199       | 5587            | 65               | 18       | 367      | 524             |
| 243      | HMG-243    | 1        | 5        | 145       | 14851           | 107              | 1       | 15       | 100       | 838             | 89               | 1        | 292      | 612             |
| 244      | HMG-244    | 4        | 31       | 300       | 16204           | 154              | 2       | 38       | 95        | 1759            | 43               | 1        | 302      | 666             |
| 245      | HMG-245    | 3        | 6        | 21        | 4989            | 54               | 3       | 19       | 75        | 46              | 42               | 1        | 164      | 365             |
| 246      | HMG-246    | 2        | 2        | 10        | 1012            | 26               | 3       | 14       | 30        | 1481            | 31               | 1        | 200      | 563             |
| 247      | HMG-247    | 4        | 7        | 22        | 193             | 52               | 5       | 49       | 59        | 204             | 44               | 1        | 157      | 620             |
| 248      | 3FL        | 2        | 1        | 6         | 2               | 26               | 2       | 6        | 47        | 2               | 25               | 1        | 48       | 230             |
| 249      | LNT        | 1        | 3        | 3         | 2               | 26               | 3727    | 10076    | 6003      | 7760            | 3816             | 1        | 395      | 259             |
| 250      | LNnT       | 1        | 18       | 38        | 17              | 35               | 1       | 5        | 29        | 3               | 24               | 19       | 2133     | 1103            |
| 251      | LNFPi      | 1        | 2        | 6         | 2               | 33               | 3223    | 8837     | 6800      | 8853            | 817              | 1        | 253      | 272             |
| 252      | LNFPii     | 2        | 9        | 6         | 2               | 33               | 2       | 14       | 33        | 4               | 37               | 0        | 263      | 238             |
| 253      | LDFT       | 1        | 3        | 6         | 4               | 56               | 1       | 7        | 31        | 1               | 43               | 2        | 204      | 300             |
| 254      | LNDfHI     | 4        | 3        | 13        | 5               | 44               | 2       | 23       | 60        | 5               | 27               | 1        | 312      | 366             |
| 255      | LSTa       | 5        | 11       | 11        | 3               | 20               | 9       | 128      | 746       | 1925            | 27               | 1        | 141      | 153             |
| 256      | LSTb       | 1        | 3        | 5         | 3               | 29               | 2       | 9        | 40        | 7810            | 37               | 0        | 48       | 212             |
| 257      | LSTc       | 1        | 5        | 6         | 32              | 36               | 2       | 7        | 34        | 6               | 40               | 2        | 290      | 1084            |
| 258      | Sialyl Lea | 0        | 6        | 9         | 2               | 19               | 1       | 3        | 6         | 1               | 22               | 1        | 32       | 37              |
| 259      | DSLNT      | 1        | 1        | 1         | 1               | 45               | 2       | 6        | 35        | 8293            | 32               | 1        | 228      | 228             |
| 260      | Biotin     | 1        | 2        | 3         | 1               | 22               | 1       | 2        | 4         | 2               | 14               | 1        | 2        | 4               |

Table S6: Virological and clinical characteristics of rotavirus strains used in this study

| <b>Variable</b>                                                              | <b>N155</b>                                                                                                                    | <b>RV3</b>                                                                                            | <b>B223</b>   |
|------------------------------------------------------------------------------|--------------------------------------------------------------------------------------------------------------------------------|-------------------------------------------------------------------------------------------------------|---------------|
| Stool sample from                                                            | Human, neonate                                                                                                                 | Human, neonate                                                                                        | Bovine, calf  |
| Genotype                                                                     | G10P[11]                                                                                                                       | G3P[6]                                                                                                | G10P[11]      |
| Country of origin                                                            | India                                                                                                                          | Australia                                                                                             | United States |
| Gastrointestinal symptoms reported in subject                                | Yes                                                                                                                            | No                                                                                                    | Yes           |
| Reassortant virus                                                            | Yes<br>(Bovine-human reassortant)                                                                                              | No                                                                                                    | No            |
| Origin of VP4 gene                                                           | Bovine                                                                                                                         | Human                                                                                                 | Bovine        |
| VP4 genotype exclusively associated with presence or absence of GI symptoms? | No.<br>P[11] viruses have been detected in stool samples from neonates with GI symptoms and those with asymptomatic infections | No.<br>P[6] viruses belonging to the same cluster as RV3 have been isolated from symptomatic neonates | No.           |
